# Supplementary material for: Ligand-free copper-catalyzed C(sp3)–H imidation of aromatic and aliphatic methyl sulfides with N-fluorobenzenesulfonimide
Source: Royal Society of Chemistry journal article supplement (doi:10.1039/d1ra00686j), 2021-01-01

Supporting Information for  
Ligand-Free Copper-Catalyzed C(sp<sup>3</sup>)-H Imidation of Aromatic and Aliphatic  
Methyl Sulfides with *N*-Fluorobenzenesulfonimide

Si-Chang Wang,<sup>a</sup> Ming-Nan Feng,<sup>a</sup> Yue Ji,<sup>a</sup> Wei-Wei Han,<sup>a</sup> Cong-Yu Ke,<sup>a</sup> Qun-Zheng Zhang<sup>a</sup> and Xun-Li  
Zhang<sup>a,\*</sup>  
xlzhang@xsyu.edu.cn

## Content

|                                                                                                                                                    |     |
|----------------------------------------------------------------------------------------------------------------------------------------------------|-----|
| <b>1. Experimental Section</b> .....                                                                                                               | S2  |
| 1.1 General information .....                                                                                                                      | S2  |
| 1.2 General procedure for the preparation of <i>N</i> -(phenylsulfonyl)- <i>N</i> -((phenylthio)methyl)-<br>benzenesulfonamide derivatives 3 ..... | S2  |
| 1.3 General procedure for the preparation of <i>N</i> -((alkylthio)methyl)- <i>N</i> -(phenylsulfonyl)-<br>benzenesulfonamides 5 ... ..            | S2  |
| <b>2. <sup>1</sup>H and <sup>13</sup>C NMR Data</b> .....                                                                                          | S11 |

## 1 Experimental Section

### 1.1 General information

All chemicals were obtained from commercial suppliers and used without further purification. All reactions were conducted in oven-dried glasswares under air condition.  $^1\text{H}$  NMR and  $^{13}\text{C}$  NMR spectra were recorded on Bruker AVANCE DMX-400 spectrometry at 400MHz DMSO, respectively. Mass spectra were performed on a Bruker Esquire 3000plus mass spectrometer equipped with EI interface and ion trap analyzer. HRMS were obtained on a Bruker 7-tesla FT-ICR MS equipped with an electrospray source.

### 1.2 General procedure for the preparation of *N*-(phenylsulfonyl)-*N*-((phenylthio)methyl)benzenesulfonamide derivatives **3**

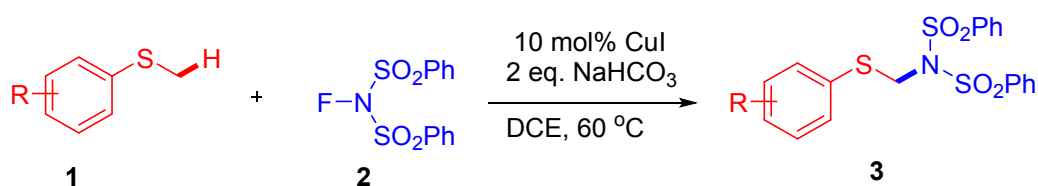

In a dry 25 mL round-bottom flask, aromatic methyl sulfide (0.5 mmol, 1 equiv), NFSI (0.6 mmol, 1.2 equiv), CuI (0.1 equiv) and NaHCO<sub>3</sub> (1 mmol, 2.0 equiv) were dissolved in 3 mL of DCE, the resulting mixture was heated to 60 °C for 8 h. The solution was then cooled to rt, diluted with CH<sub>3</sub>COOC<sub>2</sub>H<sub>5</sub>, washed with a saturated aqueous solution of NaCl, dried over Na<sub>2</sub>SO<sub>4</sub>, filtered and evaporated under reduced pressure. The crude product was purified by silica gel column chromatography to afford the corresponding benzenesulfonamide derivatives.

### 1.3 General procedure for the preparation of *N*-((alkylthio)methyl)-*N*-(phenylsulfonyl)benzenesulfonamides **5**

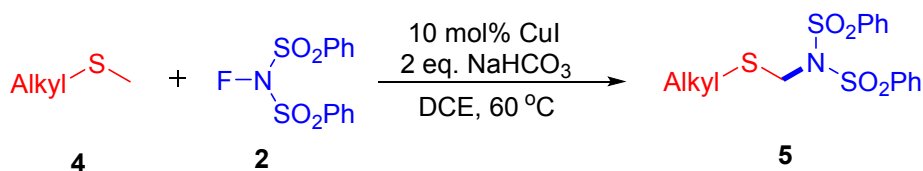

In a dry 25 mL round-bottom flask, aliphatic methyl sulfide (0.5 mmol, 1 equiv), NFSI (0.6 mmol, 1.2 equiv), CuI (0.1 equiv) and NaHCO<sub>3</sub> (1 mmol, 2.0 equiv) were dissolved in 3 mL of DCE, the resulting mixture was heated to 60 °C for 8 h. The solution was then cooled to rt, diluted with CH<sub>3</sub>COOC<sub>2</sub>H<sub>5</sub>, washed with a saturated aqueous solution of NaCl, dried over Na<sub>2</sub>SO<sub>4</sub>, filtered and evaporated under reduced pressure. The crude product was purified by silica gel column chromatography to afford the corresponding benzenesulfonamide derivatives.

**3a:** *N*-(phenylsulfonyl)-*N*-((phenylthio)methyl)benzenesulfonamide: Isolated as white solid, yield 85%.

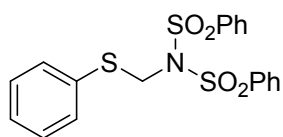

<sup>1</sup>H NMR (400MHz, DMSO-*d*<sub>6</sub>) δ: 7.98-7.95 (m, 4H), 7.81-7.77 (m, 2H), 7.68-7.64 (m, 4H), 7.33-7.30 (m, 5H), 5.42 (s, 2H). <sup>13</sup>C NMR (100MHz, DMSO-*d*<sub>6</sub>) δ: 139.1, 134.6, 133.1, 131.5, 129.4, 129.1, 127.9, 127.8, 54.2. HRMS (EI, m/z) M<sup>+</sup>: calcd for C<sub>19</sub>H<sub>17</sub>NO<sub>4</sub>S<sub>3</sub>: 419.0320; found: 419.0324.

**3b:** *N*-(phenylsulfonyl)-*N*-((*p*-tolylthio)methyl)benzenesulfonamide: Isolated as white solid, yield 88%.

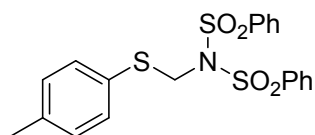

<sup>1</sup>H NMR (400MHz, DMSO-*d*<sub>6</sub>) δ: 7.99-7.99 (m, 4H), 7.80-7.76 (m, 2H), 7.68-7.64 (m, 4H), 7.21-7.11 (m, 4H), 5.37 (s, 2H), 2.27 (s, 3H). <sup>13</sup>C NMR (100MHz, DMSO-*d*<sub>6</sub>) δ: 139.1, 137.6, 134.5, 132.0, 129.7, 129.4, 127.9, 54.7, 20.6. HRMS (EI, m/z) M<sup>+</sup>: calcd for C<sub>20</sub>H<sub>19</sub>NO<sub>4</sub>S<sub>3</sub>: 433.0476; found: 433.0478.

**3c:** *N*-(((4-methoxyphenyl)thio)methyl)-*N*-(phenylsulfonyl)benzenesulfonamide: Isolated as white solid, yield 90%.

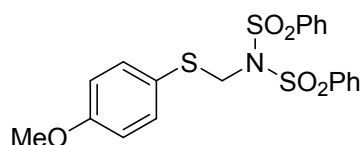

<sup>1</sup>H NMR (400MHz, DMSO-*d*<sub>6</sub>) δ: 8.03-8.01 (m, 4H), 7.83-7.80 (m, 2H), 7.80-7.79 (m, 4H), 7.26-7.24 (m, 2H), 6.91-6.88 (m, 2H), 5.32 (s, 2H), 3.76 (s, 3H). <sup>13</sup>C NMR (100MHz, DMSO-*d*<sub>6</sub>) δ: 159.5, 139.2, 134.7, 134.5, 129.4, 128.0, 123.0, 114.7, 55.6, 55.2. HRMS (EI, m/z) M<sup>+</sup>: calcd for C<sub>20</sub>H<sub>19</sub>NO<sub>5</sub>S<sub>3</sub>: 449.0425; found: 449.0430.

**3d:** *N*-(((4-fluorophenyl)thio)methyl)-*N*-(phenylsulfonyl)benzenesulfonamide: Isolated as light yellow solid, yield 76%.

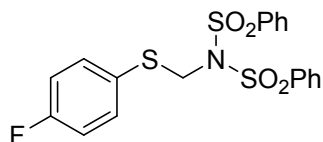

$^1\text{H}$  NMR (400MHz, DMSO- $d_6$ )  $\delta$ : 8.00-7.98 (m, 4H), 7.82-7.78 (m, 2H), 7.78-7.76 (m, 4H), 7.37-7.18 (m, 2H), 7.19-7.14 (m, 2H), 5.38 (s, 2H).  $^{13}\text{C}$  NMR (100MHz, DMSO- $d_6$ )  $\delta$ : 163.3, 160.8, 139.1, 134.8, 134.7, 134.6, 132.0, 129.4, 128.4, 128.3, 127.9, 116.3, 116.0, 55.0. HRMS (EI, m/z)  $\text{M}^+$ : calcd for  $\text{C}_{19}\text{H}_{16}\text{FNO}_4\text{S}_3$ : 437.0220; found: 437.0221.

**3e:** *N*-(((4-chlorophenyl)thio)methyl)-*N*-(phenylsulfonyl)benzenesulfonamide: Isolated as light yellow solid, yield 81%.

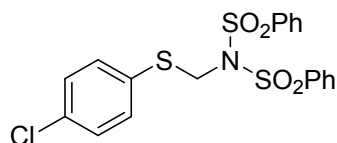

$^1\text{H}$  NMR (400MHz, DMSO- $d_6$ )  $\delta$ : 7.98-7.95 (m, 4H), 7.82-7.78 (m, 2H), 7.69-7.65 (m, 4H), 7.40-7.33 (m, 4H), 5.42 (s, 2H).  $^{13}\text{C}$  NMR (100MHz, DMSO- $d_6$ )  $\delta$ : 138.9, 134.6, 133.4, 132.7, 132.0, 129.4, 129.0, 128.0, 54.2. HRMS (EI, m/z)  $\text{M}^+$ : calcd for  $\text{C}_{19}\text{H}_{16}\text{ClNO}_4\text{S}_3$ : 452.9984; found: 452.9983.

**3f:** *N*-(((4-nitrophenyl)thio)methyl)-*N*-(phenylsulfonyl)benzenesulfonamide: Isolated as light yellow solid, yield 72%.

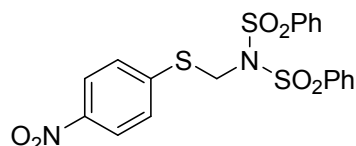

$^1\text{H}$  NMR (400MHz, DMSO- $d_6$ )  $\delta$ : 8.15-8.13 (m, 2H), 7.98-7.95 (m, 4H), 7.82-7.78 (m, 2H), 7.68-7.61 (m, 6H), 5.61 (s, 2H).  $^{13}\text{C}$  NMR (100MHz, DMSO- $d_6$ )  $\delta$ : 145.9, 143.3, 138.7, 134.8, 129.8, 129.5, 127.9, 123.8, 52.1. HRMS (EI, m/z)  $\text{M}^+$ : calcd for  $\text{C}_{19}\text{H}_{16}\text{N}_2\text{O}_6\text{S}_3$ : 464.0269; found: 464.0267.

**3g:** *N*-(((4-cyanophenyl)thio)methyl)-*N*-(phenylsulfonyl)benzenesulfonamide: Isolated as white solid, yield 77%.

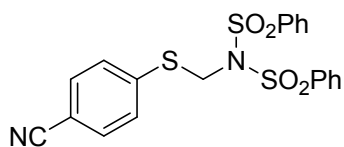

$^1\text{H}$  NMR (400MHz,  $\text{DMSO-}d_6$ )  $\delta$ : 7.98-7.96 (m, 4H), 7.86-7.77 (m, 3H), 7.68-7.64 (m, 4H), 7.41-7.35 (m, 2H), 7.02-6.98 (m, 1H), 5.46 (s, 2H).  $^{13}\text{C}$  NMR (100MHz,  $\text{DMSO-}d_6$ )  $\delta$ : 139.4, 138.8, 138.3, 134.7, 130.7, 129.5, 128.9, 128.8, 127.9, 102.3, 53.3. HRMS (EI,  $m/z$ )  $\text{M}^+$ : calcd for  $\text{C}_{20}\text{H}_{16}\text{N}_2\text{O}_4\text{S}_3$ : 444.0272; found: 444.0271.

**3h:** *N*-(((3-methoxyphenyl)thio)methyl)-*N*-(phenylsulfonyl)benzenesulfonamide: Isolated as white solid, yield 93%.

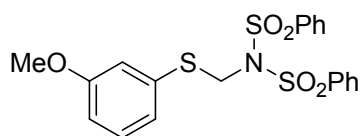

$^1\text{H}$  NMR (400MHz,  $\text{DMSO-}d_6$ )  $\delta$ : 7.99-7.97 (m, 4H), 7.82-7.78 (m, 2H), 7.68-7.64 (m, 4H), 7.25-7.22 (m, 1H), 6.92-6.84 (m, 3H), 5.44 (s, 2H), 3.71 (s, 3H).  $^{13}\text{C}$  NMR (100MHz,  $\text{DMSO-}d_6$ )  $\delta$ : 159.3, 139.1, 134.5, 134.2, 129.9, 129.4, 127.9, 123.3, 116.2, 113.9, 55.1, 54.0. HRMS (EI,  $m/z$ )  $\text{M}^+$ : calcd for  $\text{C}_{20}\text{H}_{19}\text{NO}_5\text{S}_3$ : 449.0425; found: 449.0425.

**3i:** *N*-(phenylsulfonyl)-*N*-((phenylthio)methyl)benzenesulfonamide: Isolated as light yellow solid, yield 82%.

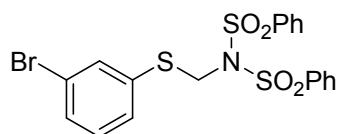

$^1\text{H}$  NMR (400MHz,  $\text{DMSO-}d_6$ )  $\delta$ : 7.98-7.95 (m, 4H), 7.83-7.79 (m, 2H), 7.69-7.65 (m, 4H), 7.50-7.47 (m, 2H), 7.45-7.36 (m, 1H), 7.35-7.25 (m, 1H), 5.46 (s, 2H).  $^{13}\text{C}$  NMR (100MHz,  $\text{DMSO-}d_6$ )  $\delta$ :

138.9, 135.5, 134.6, 130.8, 130.6, 130.3, 129.4, 127.9, 121.9, 53.8. HRMS (EI, m/z)  $M^+$ : calcd for  $C_{19}H_{16}BrNO_4S_3$ : 496.9425; found: 496.9427.

**3j**: *N*-(((3-chlorophenyl)thio)methyl)-*N*-(phenylsulfonyl)benzenesulfonamide: Isolated as light yellow solid, yield 79%.

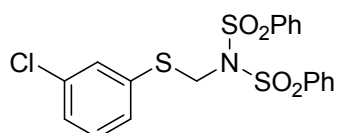

$^1H$  NMR (400MHz,  $DMSO-d_6$ )  $\delta$ : 7.98-7.95 (m, 4H), 7.82-7.78 (m, 2H), 7.69-7.65 (m, 4H), 7.36-7.31 (m, 4H), 5.46 (s, 2H).  $^{13}C$  NMR (100MHz,  $DMSO-d_6$ )  $\delta$ : 138.9, 135.2, 134.6, 133.3, 130.7, 130.6, 129.8, 127.9, 127.7, 53.8. HRMS (EI, m/z)  $M^+$ : calcd for  $C_{19}H_{16}ClNO_4S_3$ : 452.9930; found: 452.9930.

**3k**: *N*-(((3,5-dichlorophenyl)thio)methyl)-*N*-(phenylsulfonyl)benzenesulfonamide: Isolated as light yellow solid, yield 76%.

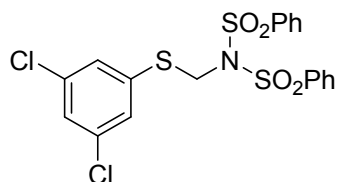

$^1H$  NMR (400MHz,  $DMSO-d_6$ )  $\delta$ : 8.00-7.97 (t,  $J = 7.8$  Hz, 4H), 7.83-7.79 (t,  $J = 7.5$  Hz, 2H), 7.70-7.66 (m, 4H), 7.53-7.51 (t,  $J = 1.8$  Hz, 1H), 7.36-7.35 (d,  $J = 1.8$  Hz, 2H), 5.52 (s, 2H).  $^{13}C$  NMR (100MHz,  $DMSO-d_6$ )  $\delta$ : 138.9, 136.9, 134.6, 134.1, 129.4, 129.3, 127.9, 127.3, 53.4. HRMS (EI, m/z)  $M^+$ : calcd for  $C_{19}H_{15}Cl_2NO_4S_3$ : 486.9540; found: 486.9538.

**3l**: *N*-(((2-methoxyphenyl)thio)methyl)-*N*-(phenylsulfonyl)benzenesulfonamide: Isolated as white solid, yield 91%.

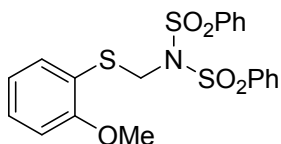

$^1\text{H}$  NMR (400MHz,  $\text{DMSO-}d_6$ )  $\delta$ : 7.97-7.94 (m, 4H), 7.82-7.77 (m, 2H), 7.69-7.65 (m, 4H), 7.32-7.31 (t,  $J = 0.8$  Hz, 1H), 7.09-7.01 (m, 2H), 6.86-6.82 (m, 1H), 5.38 (s, 2H), 3.82 (s, 3H).  $^{13}\text{C}$  NMR (100MHz,  $\text{DMSO-}d_6$ )  $\delta$ : 158.4, 139.1, 134.4, 133.1, 129.9, 129.3, 127.9, 120.6, 119.7, 111.4, 55.6, 52.1. HRMS (EI,  $m/z$ )  $M^+$ : calcd for  $\text{C}_{20}\text{H}_{19}\text{NO}_5\text{S}_3$ : 449.0425; found: 449.0428.

**3m:** *N*-(((2-fluorophenyl)thio)methyl)-*N*-(phenylsulfonyl)benzenesulfonamide: Isolated as light yellow solid, yield 78%.

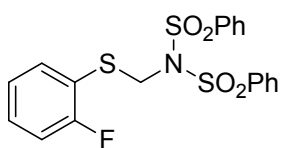

$^1\text{H}$ NMR (400MHz,  $\text{DMSO-}d_6$ )  $\delta$ : 7.98-7.96 (m, 4H), 7.80-7.79 (m, 2H), 7.67 (s, 4H), 7.39-7.13 (m, 4H), 5.39 (s, 2H).  $^{13}\text{C}$ NMR (100MHz,  $\text{DMSO-}d_6$ )  $\delta$ : 138.9, 134.6, 134.5, 131.0, 130.9, 129.4, 127.9, 124.9, 116.0, 115.8, 53.2. HRMS (EI,  $m/z$ )  $M^+$ : calcd for  $\text{C}_{19}\text{H}_{16}\text{FNO}_4\text{S}_3$ : 437.0225; found: 437.0225.

**3n:** *N*-(((2-chlorophenyl)thio)methyl)-*N*-(phenylsulfonyl)benzenesulfonamide: Isolated as light yellow solid, yield 75%.

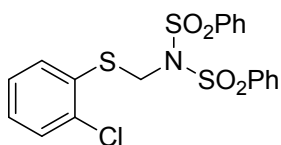

$^1\text{H}$  NMR (400MHz,  $\text{DMSO-}d_6$ )  $\delta$ : 7.99-7.96 (m, 4H), 7.83-7.78 (m, 2H), 7.69-7.64 (m, 4H), 7.51-7.40 (m, 2H), 7.32-7.29 (m, 2H), 5.48 (s, 2H).  $^{13}\text{C}$  NMR (100MHz,  $\text{DMSO-}d_6$ )  $\delta$ : 138.8, 134.7, 134.6, 132.7, 131.9, 129.8, 129.4, 127.9, 127.7, 52.6. HRMS (EI,  $m/z$ )  $M^+$ : calcd for  $\text{C}_{19}\text{H}_{16}\text{ClNO}_4\text{S}_3$ : 452.9930; found: 452.9933.

**3o:** *N*-(((2-bromophenyl)thio)methyl)-*N*-(phenylsulfonyl)benzenesulfonamide: Isolated as light yellow solid, yield 74%.

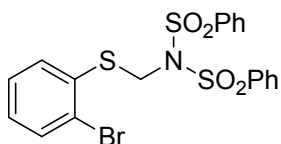

$^1\text{H}$  NMR (400MHz,  $\text{DMSO-}d_6$ )  $\delta$ : 7.99-7.96 (m, 4H), 7.82-7.78 (m, 2H), 7.69-7.64 (m, 5H), 7.46-7.33 (m, 2H), 7.24-7.19 (m, 1H), 5.49 (s, 2H).  $^{13}\text{C}$  NMR (100MHz,  $\text{DMSO-}d_6$ )  $\delta$ : 138.8, 134.6, 134.2, 133.0, 132.0, 129.4, 129.1, 128.2, 127.9, 124.9, 52.6. HRMS (EI, m/z)  $\text{M}^+$ : calcd for  $\text{C}_{19}\text{H}_{16}\text{BrNO}_4\text{S}_3$ : 496.9425; found: 496.9427.

**3p**: *N*-(((2-iodophenyl)thio)methyl)-*N*-(phenylsulfonyl)benzenesulfonamide: Isolated as white solid, yield 80%.

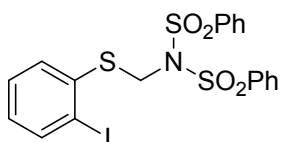

$^1\text{H}$  NMR (400MHz,  $\text{DMSO-}d_6$ )  $\delta$ : 8.00-7.98 (m, 4H), 7.82-7.78 (m, 4H), 7.69-7.65 (m, 4H), 7.58-7.56 (m, 2H), 5.59 (s, 2H).  $^{13}\text{C}$  NMR (100MHz,  $\text{DMSO-}d_6$ )  $\delta$ : 140.6, 138.7, 134.6, 132.5, 130.1, 129.4, 127.9, 118.5, 109.3, 52.4. HRMS (EI, m/z)  $\text{M}^+$ : calcd for  $\text{C}_{19}\text{H}_{16}\text{INO}_4\text{S}_3$ : 544.9286; found: 544.9286.

**3q**: *N*-(phenylsulfonyl)-*N*-((pyridin-2-ylthio)methyl)benzenesulfonamide: Isolated as white solid, yield 83%.

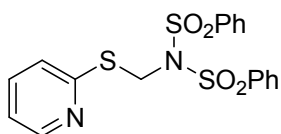

$^1\text{H}$  NMR (400MHz,  $\text{DMSO-}d_6$ )  $\delta$ : 8.53-8.50 (m, 1H), 7.91-7.88 (m, 4H), 7.75 (m, 2H), 7.61-7.57 (m, 5H), 7.22-7.15 (m, 2H), 5.91 (s, 2H).  $^{13}\text{C}$  NMR (100MHz,  $\text{DMSO-}d_6$ )  $\delta$ : 155.0, 149.2, 138.6, 137.1, 134.6, 129.3, 127.7, 122.5, 120.9, 47.8. HRMS (EI, m/z)  $\text{M}^+$ : calcd for  $\text{C}_{18}\text{H}_{16}\text{N}_2\text{O}_4\text{S}_3$ : 420.0272; found: 420.0275.



**3r:** *N*-(phenylsulfonyl)-*N*-((thiophen-2-ylthio)methyl)benzenesulfonamide: Isolated as white solid, yield 84%.

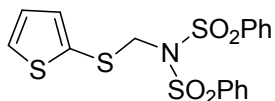

$^1\text{H}$  NMR (400MHz, DMSO- $d_6$ )  $\delta$ : 8.04-8.01 (m, 4H), 7.84-7.79 (m, 2H), 7.72-7.67 (m, 5H), 7.04-6.94 (m, 2H), 5.24 (s, 2H).  $^{13}\text{C}$  NMR (100MHz, DMSO- $d_6$ )  $\delta$ : 139.1, 135.8, 134.6, 132.1, 129.5, 129.4, 128.0, 127.9, 51.1. HRMS (EI, m/z)  $\text{M}^+$ : calcd for  $\text{C}_{17}\text{H}_{15}\text{NO}_4\text{S}_4$ : 424.9884; found: 424.9885.

**5a:** *N*-((ethylthio)methyl)-*N*-(phenylsulfonyl)benzenesulfonamide: Isolated as colorless liquid, yield 76%.

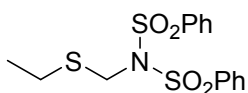

$^1\text{H}$  NMR (400MHz, DMSO- $d_6$ )  $\delta$ : 8.06-8.04 (t,  $J = 8.0$  Hz, 4H), 7.81-7.77 (m, 2H), 7.70-7.66 (m, 4H), 5.05 (s, 2H), 2.54-2.50 (m, 2H), 1.50-1.45 (m, 2H), 0.85-0.80 (m, 3H).  $^{13}\text{C}$  NMR (100MHz, DMSO- $d_6$ )  $\delta$ : 139.2, 134.4, 129.3, 127.9, 51.7, 22.2, 13.1. HRMS (EI, m/z)  $\text{M}^+$ : calcd for  $\text{C}_{16}\text{H}_{19}\text{NO}_4\text{S}_3$ : 385.0476; found: 385.0475.

**5b:** *N*-((dodecylthio)methyl)-*N*-(phenylsulfonyl)benzenesulfonamide: Isolated as colorless liquid, yield 81%.

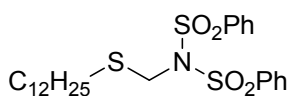

$^1\text{H}$  NMR (400MHz, DMSO- $d_6$ )  $\delta$ : 8.07-8.05 (d,  $J = 6.0$  Hz, 4H), 7.77-7.75 (d,  $J = 6.6$  Hz, 2H), 7.67-7.64 (t,  $J = 6.6$  Hz, 4H), 5.06 (s, 2H), 1.42-0.83 (m, 25H).  $^{13}\text{C}$  NMR (100MHz, DMSO- $d_6$ )  $\delta$ : 139.3, 134.2, 129.2, 127.9, 51.8, 31.3, 31.0, 29.0, 28.8, 28.7, 28.5, 28.1, 22.1, 13.8. HRMS (EI, m/z)  $\text{M}^+$ : calcd for  $\text{C}_{25}\text{H}_{37}\text{NO}_4\text{S}_3$ : 511.1885; found: 511.1883.

**5c:** (2,2-bis(phenylsulfonyl)ethyl)(cyclohexyl)sulfane: Isolated as white solid, yield 72%.

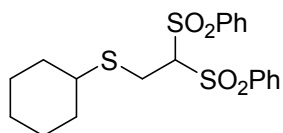

$^1\text{H}$  NMR (400MHz,  $\text{DMSO-}d_6$ )  $\delta$ : 8.09-8.07 (t,  $J = 8.6$  Hz, 4H), 7.80-7.75 (m, 2H), 7.69-7.66 (m, 4H), 5.08 (s, 2H), 1.81-1.79 (m, 2H), 1.47-1.59 (m, 3H), 2.01-1.14 (m, 6H).  $^{13}\text{C}$  NMR (100MHz,  $\text{DMSO-}d_6$ )  $\delta$ : 139.4, 134.3, 129.3, 127.9, 50.5, 42.6, 32.9, 25.3, 25.1.

HRMS (EI,  $m/z$ )  $M^+$ : calcd for  $\text{C}_{19}\text{H}_{23}\text{NO}_4\text{S}_3$ : 425.0789; found: 425.0788.

**6:** *N*-(((3-bromophenyl)sulfonyl)methyl)-*N*-(phenylsulfonyl)benzenesulfonamide: Isolated as white solid, yield 72%.

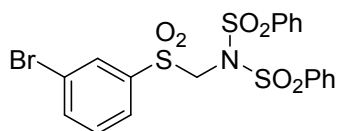

$^1\text{H}$  NMR (400MHz,  $\text{DMSO-}d_6$ )  $\delta$ : 7.98-7.96 (d,  $J = 8.4$  Hz, 4H), 7.77-7.74 (t,  $J = 7.6$  Hz, 4H), 7.62-7.53 (m, 6H), 5.56 (s, 2H).  $^{13}\text{C}$  NMR (100MHz,  $\text{DMSO-}d_6$ )  $\delta$ : 139.8, 138.6, 137.9, 135.4, 129.8, 129.1, 128.3, 128.2, 122.6, 67.6. HRMS (EI,  $m/z$ )  $M^+$ : calcd for  $\text{C}_{19}\text{H}_{16}\text{BrNO}_6\text{S}_3$ : 528.9323; found: 528.9323.

## 2 <sup>1</sup>H and <sup>13</sup>C NMR Data

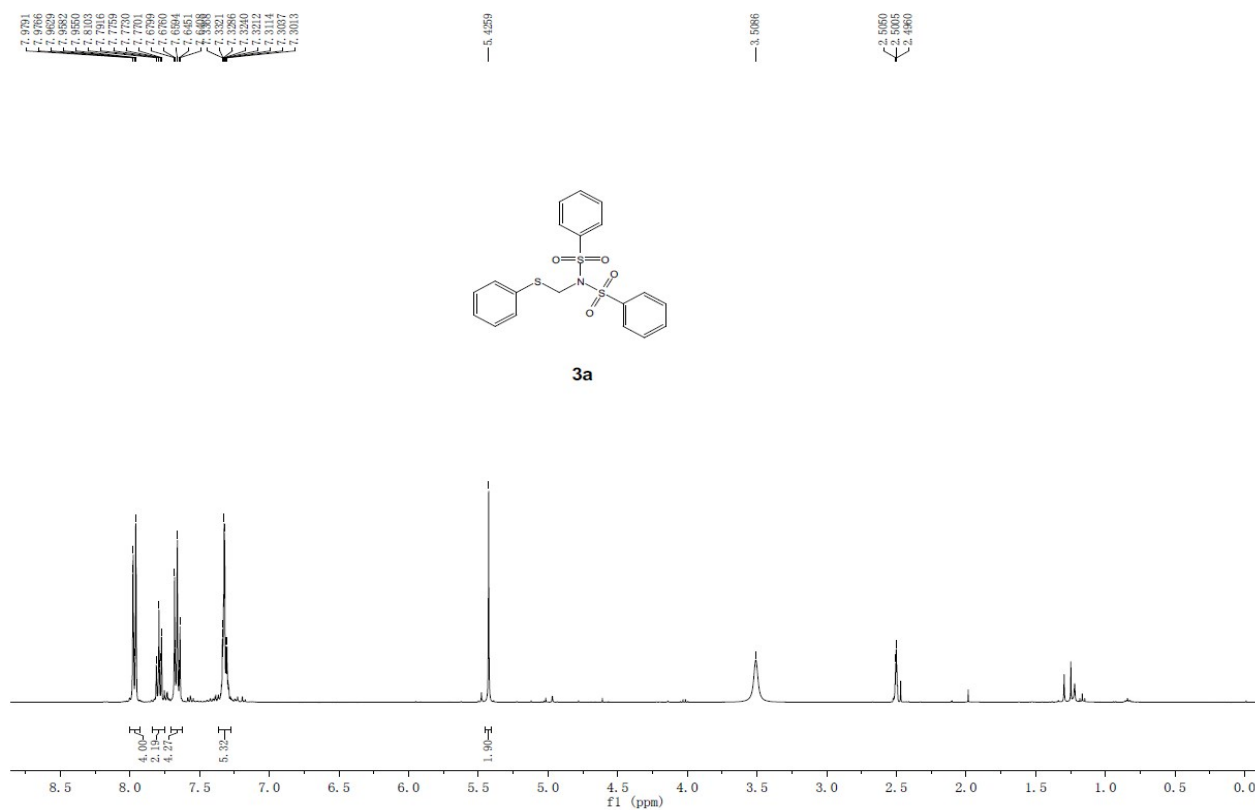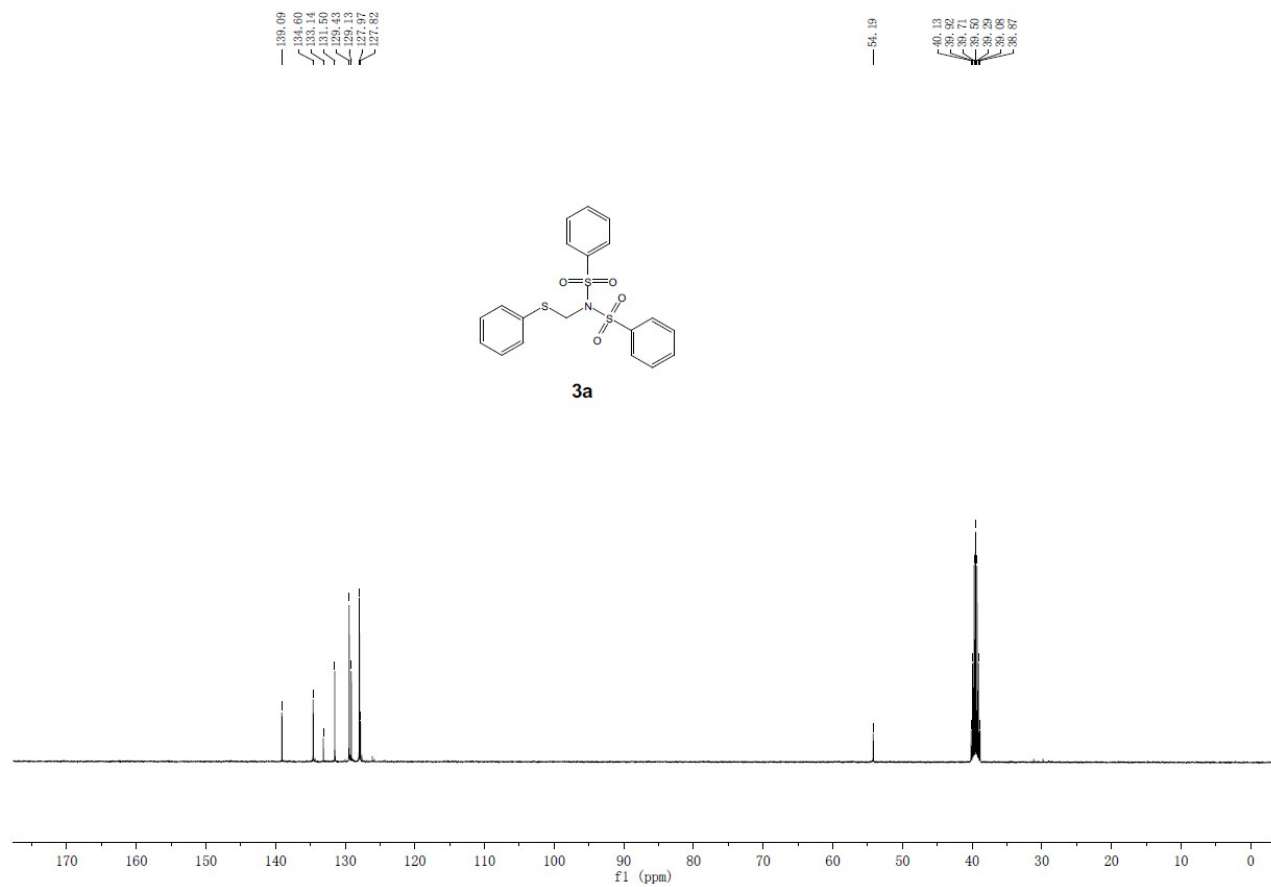

7.9865  
7.9845  
7.9795  
7.9659  
7.9627  
7.9590  
7.9540  
7.9484  
7.9387  
7.9357  
7.9271  
7.9255  
7.9219  
7.9173  
7.9155  
7.9111  
7.9076  
7.9076

6.3685

3.6839

2.5048  
2.5003  
2.4958  
2.2704

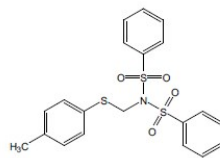

3b

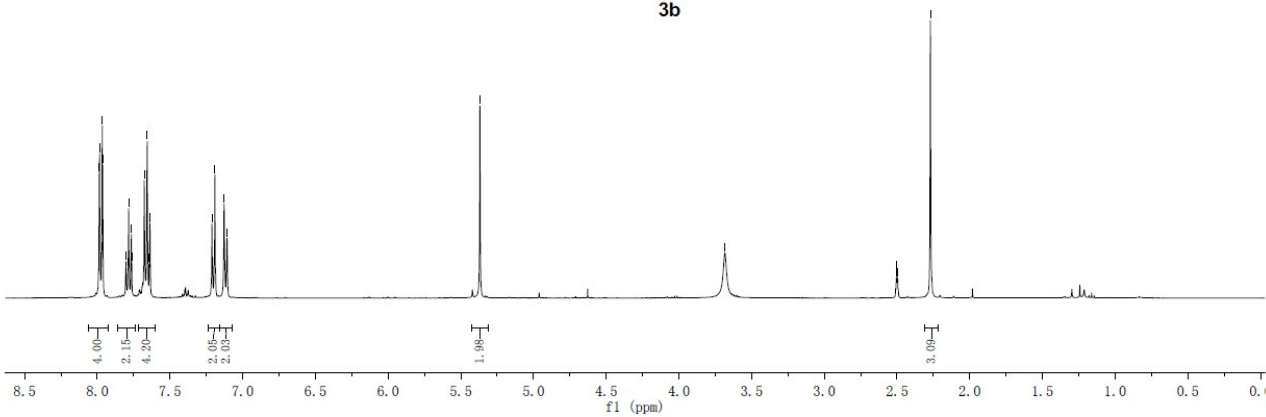

138.15  
137.60  
132.02  
129.74  
128.41  
128.38  
127.96

54.68

40.13  
39.82  
39.71  
39.50  
39.29  
39.08  
38.88

20.63

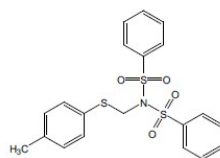

3b

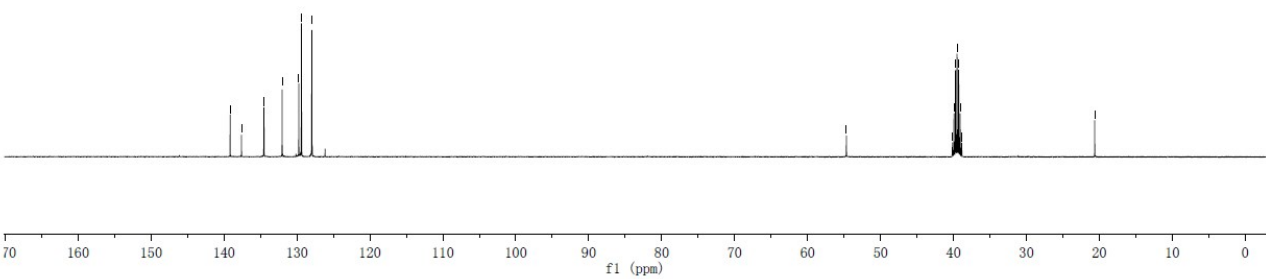

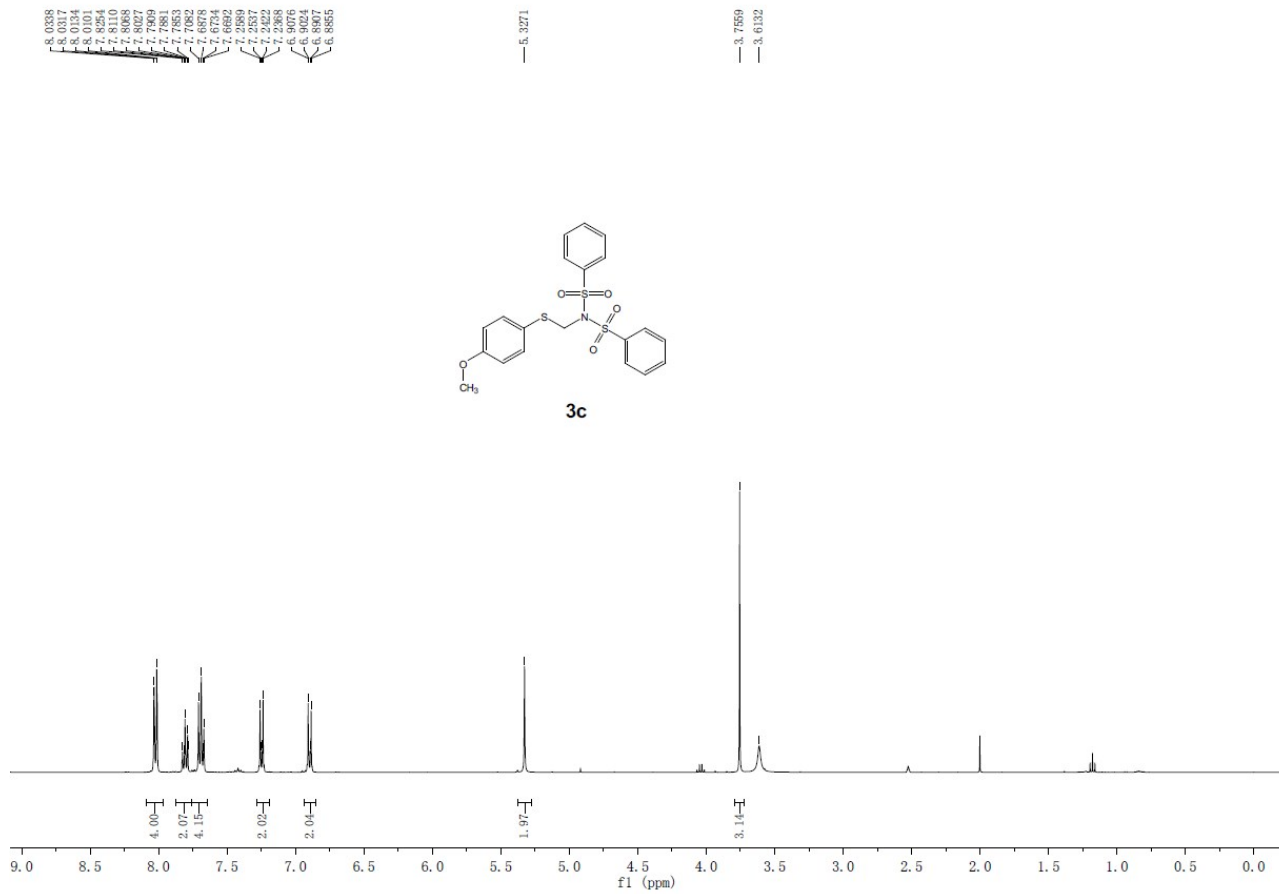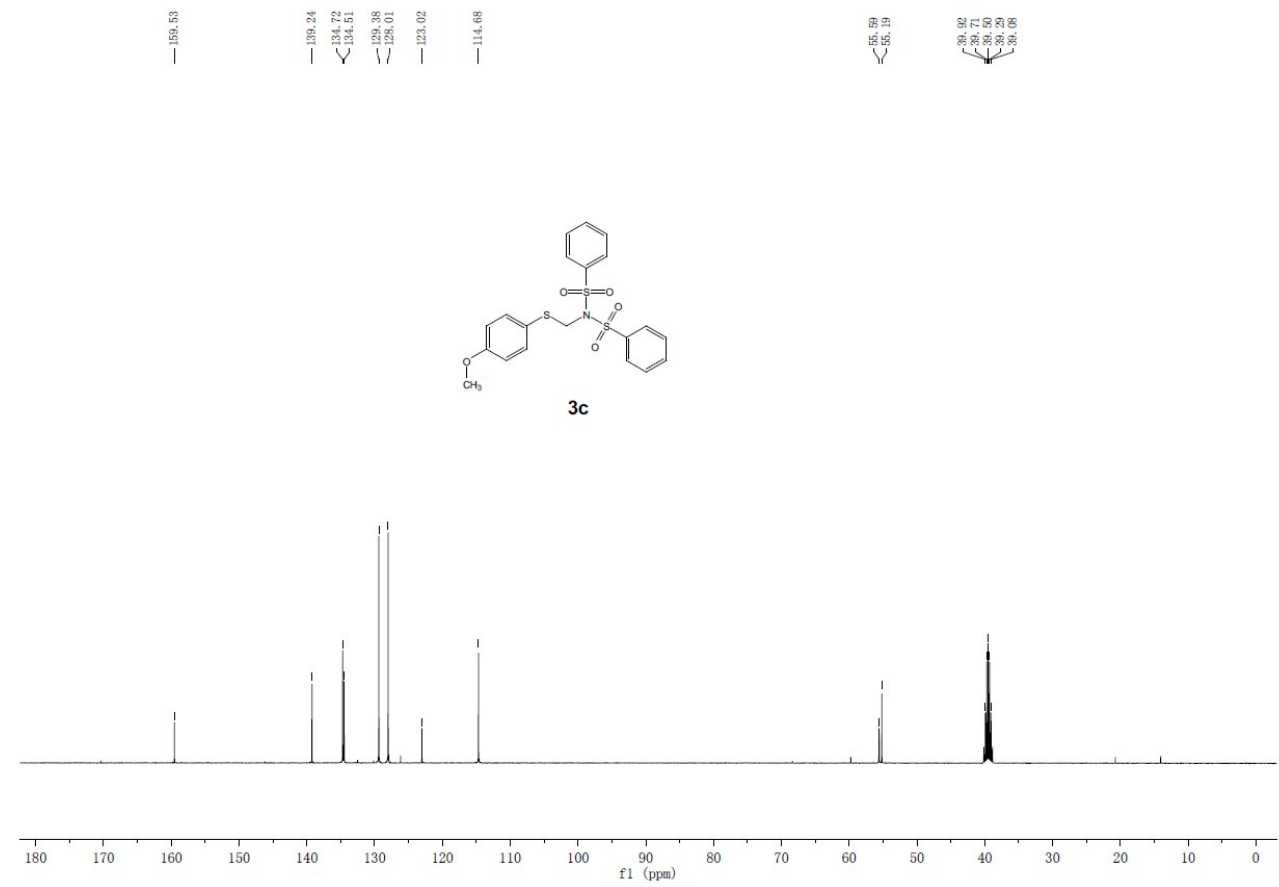

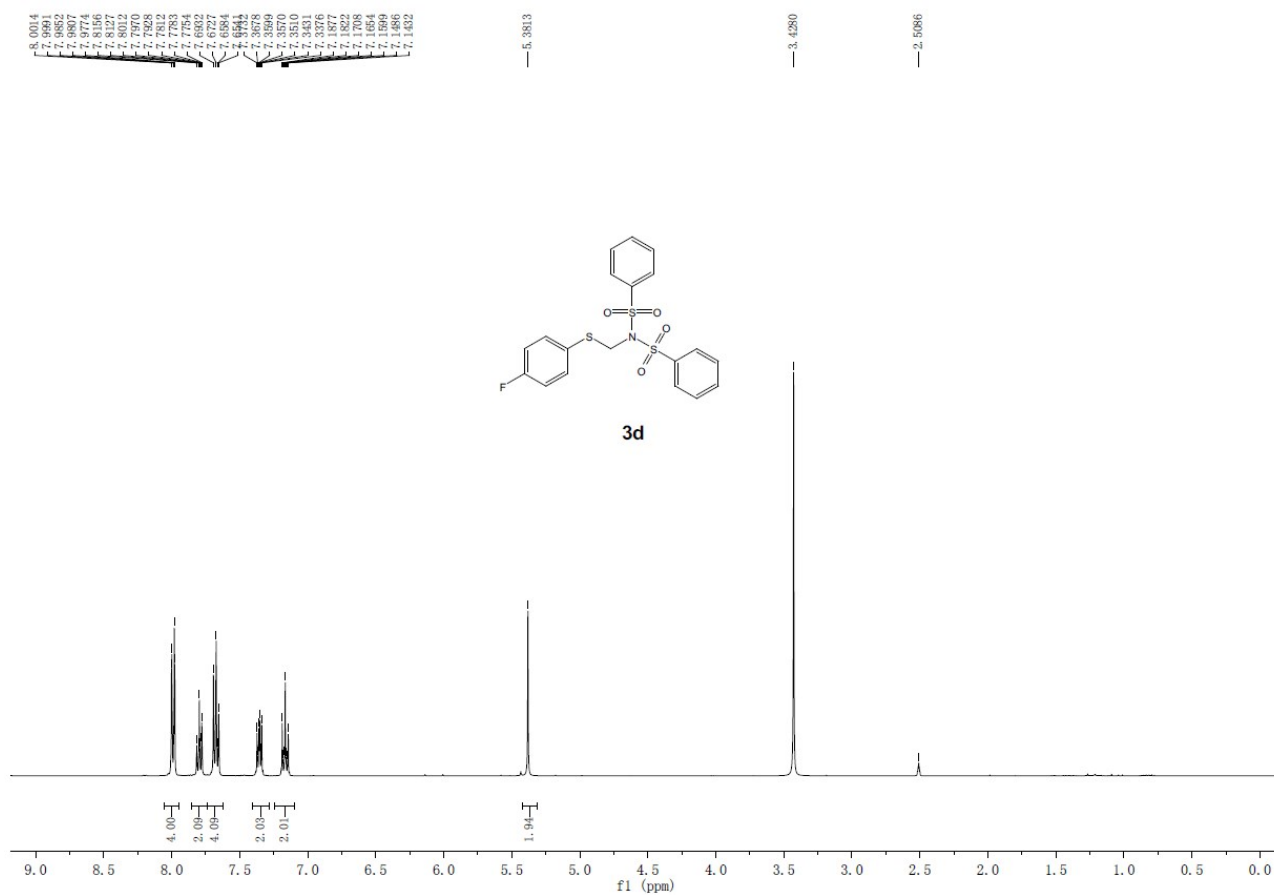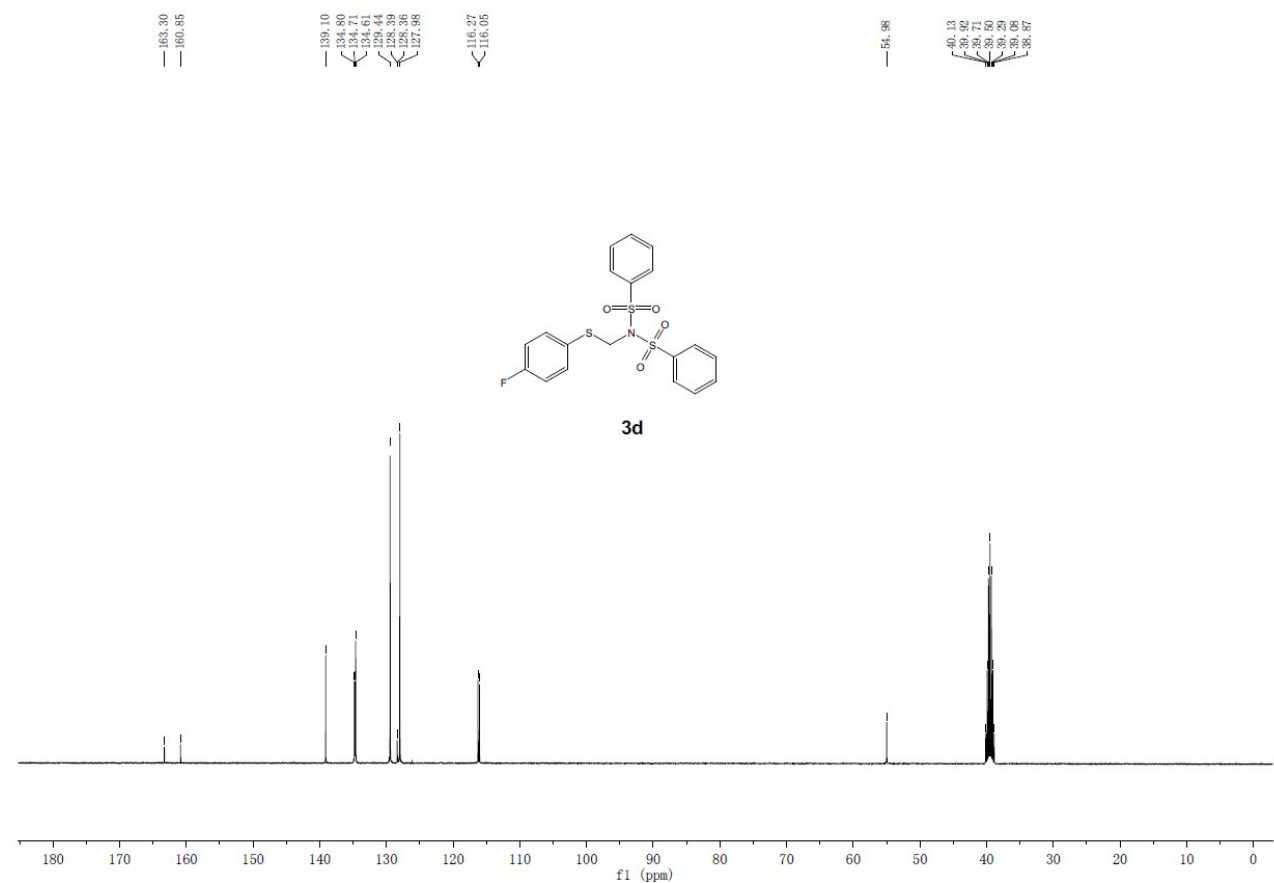

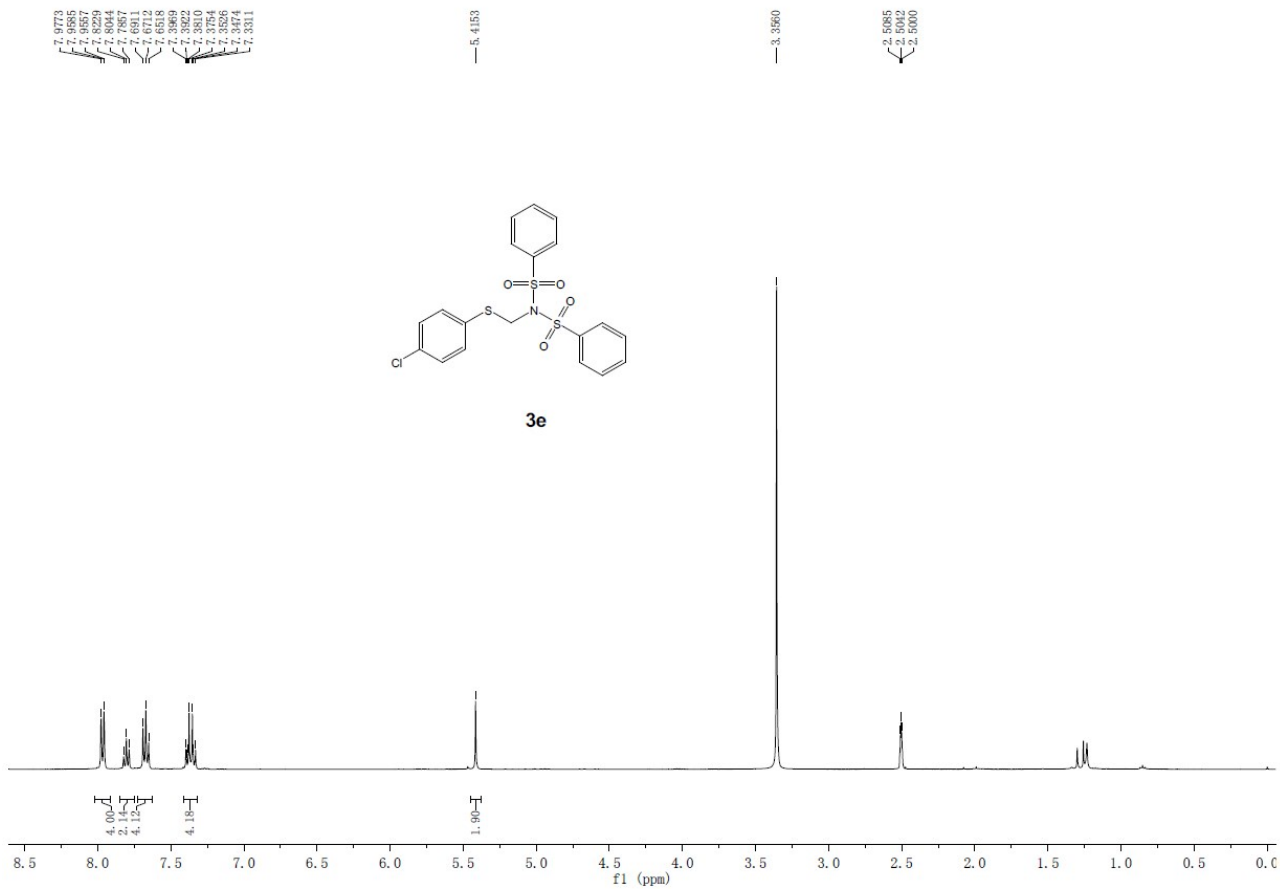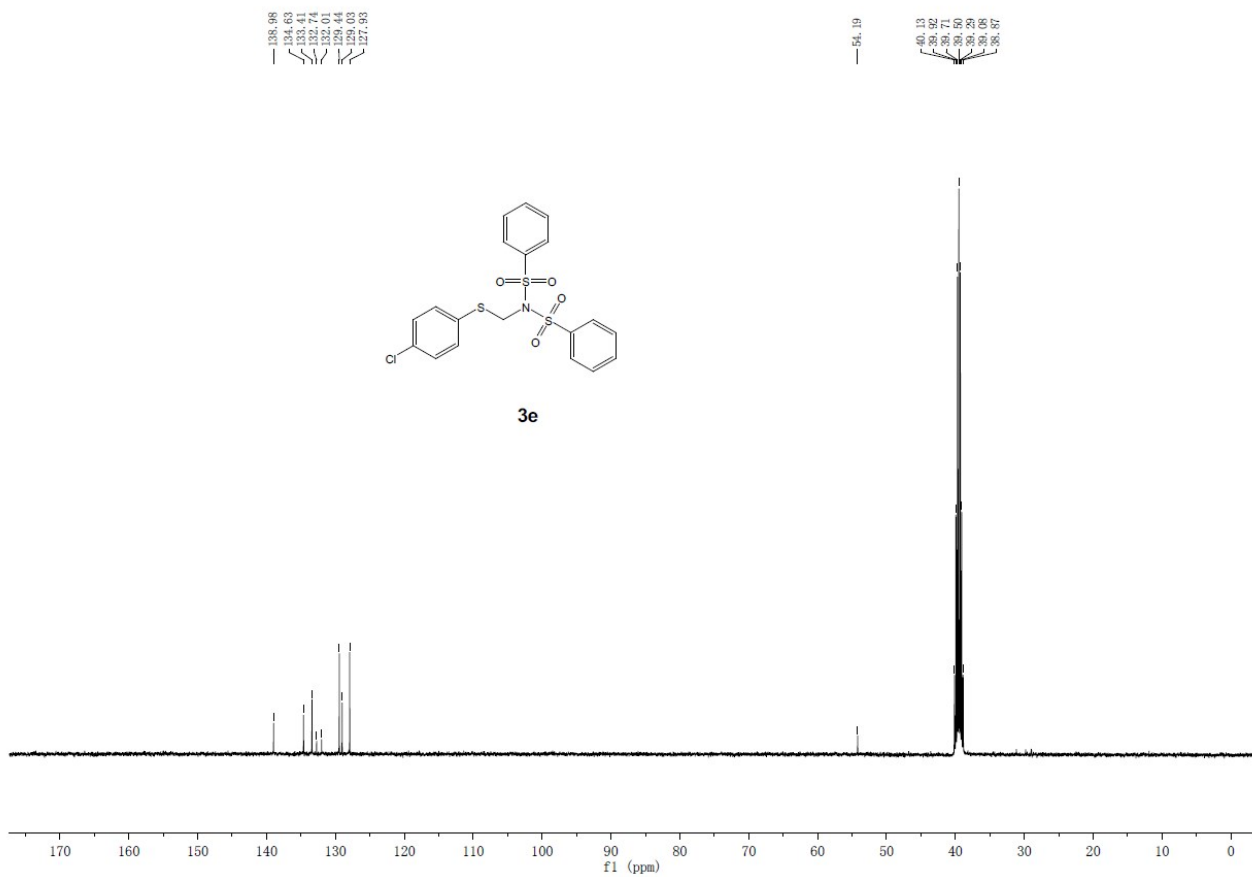

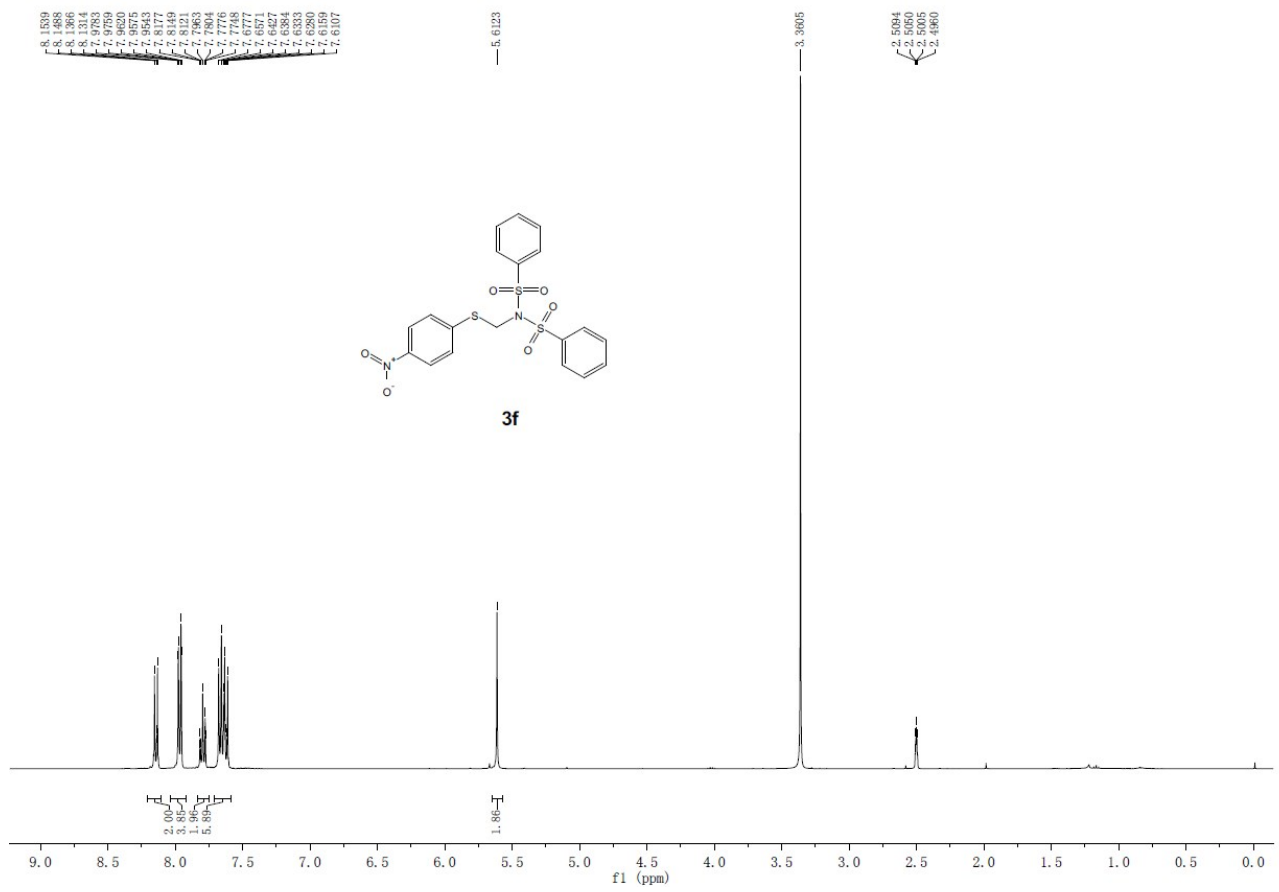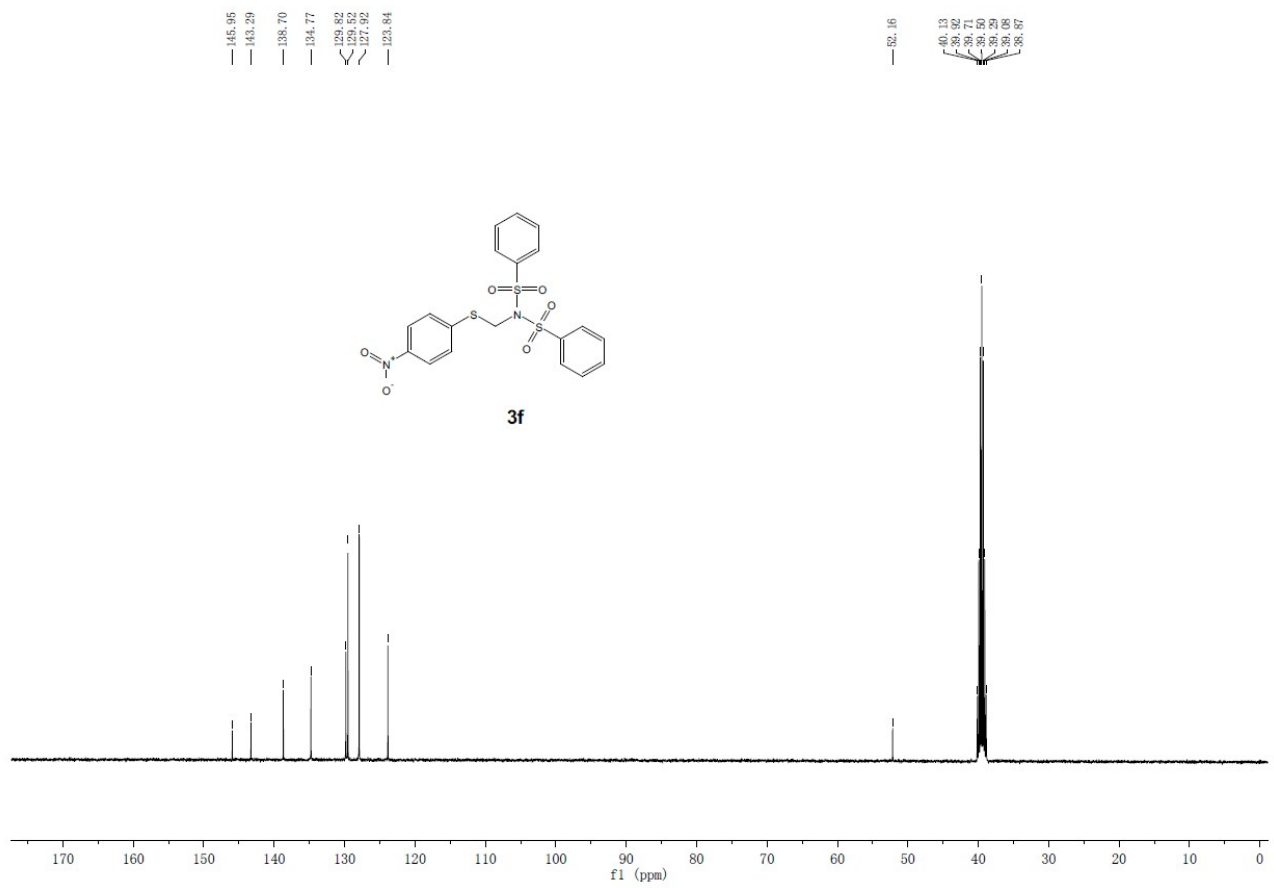



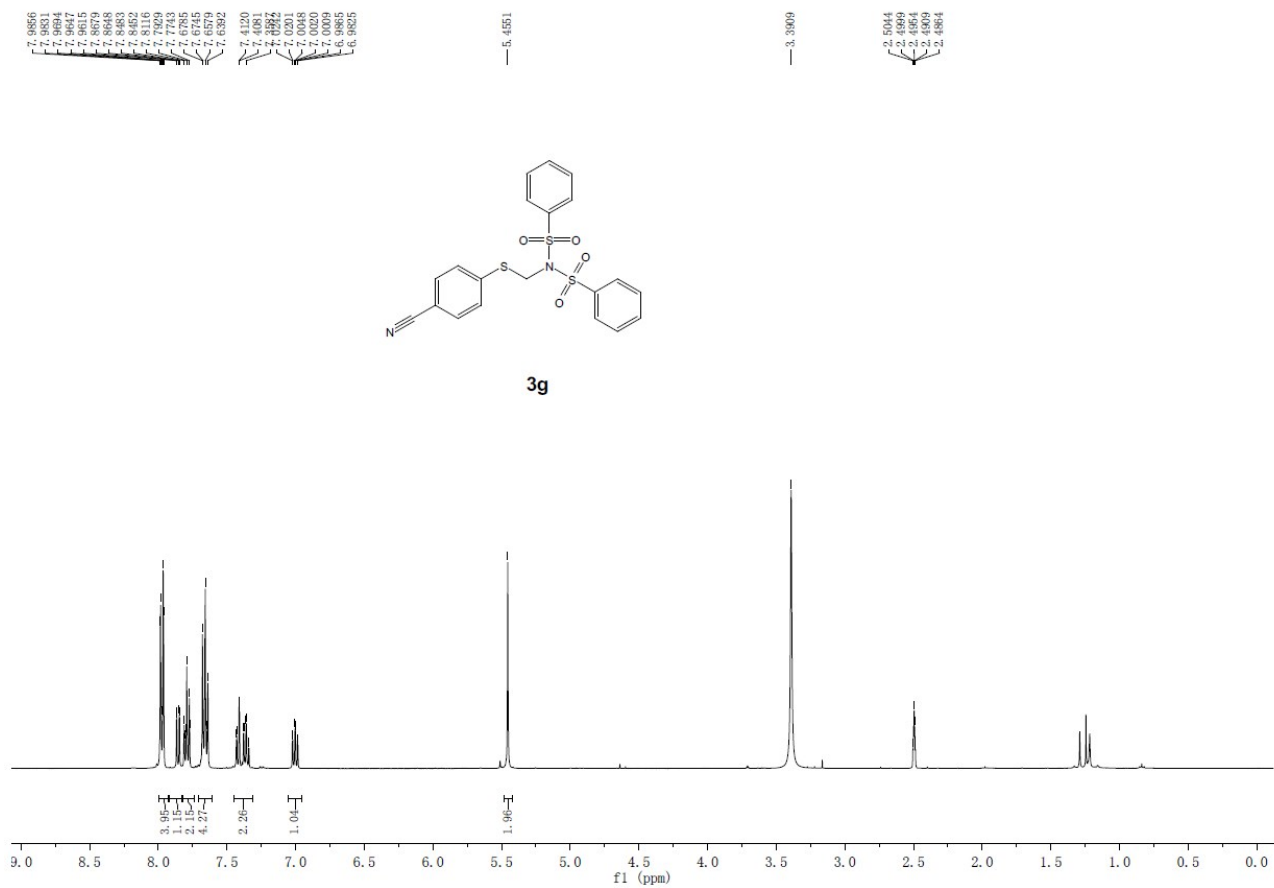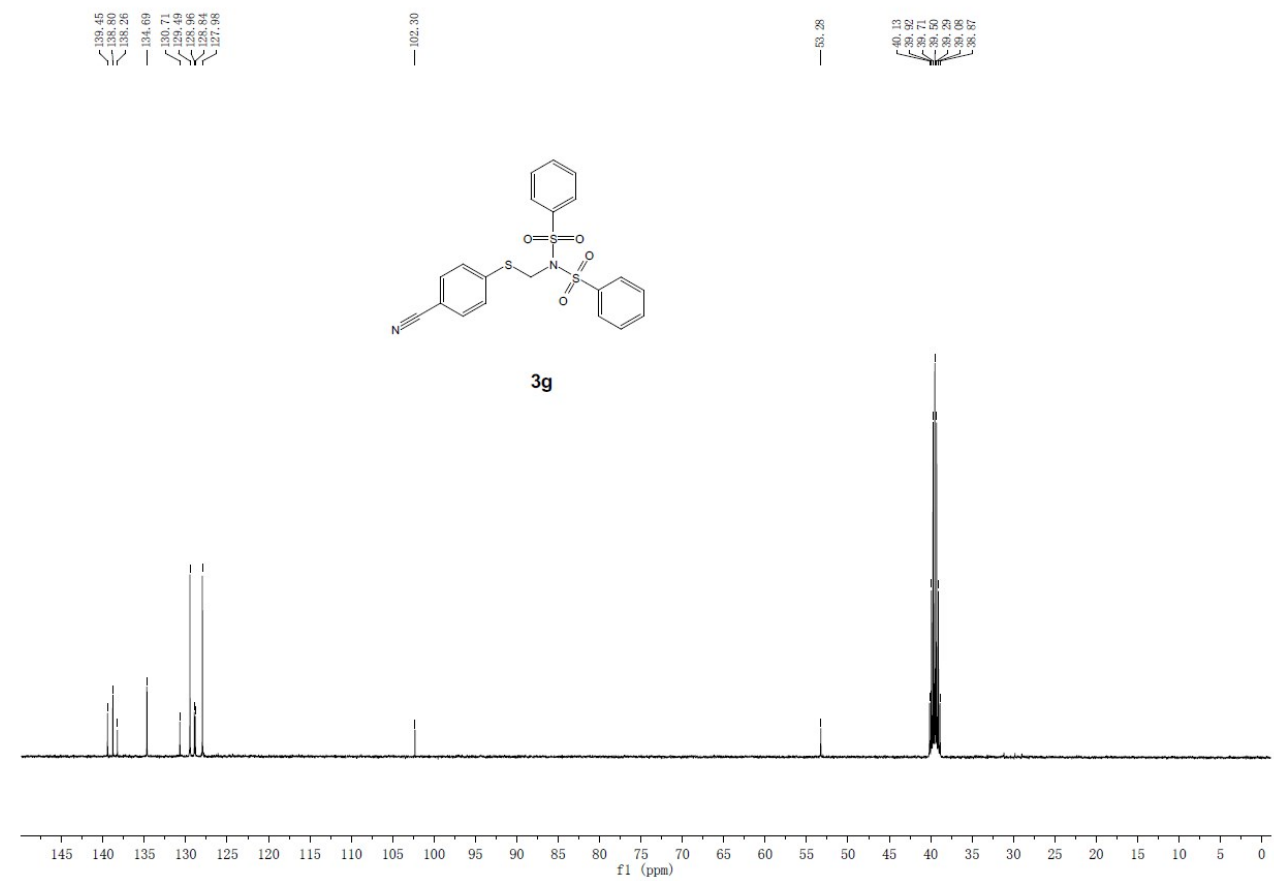

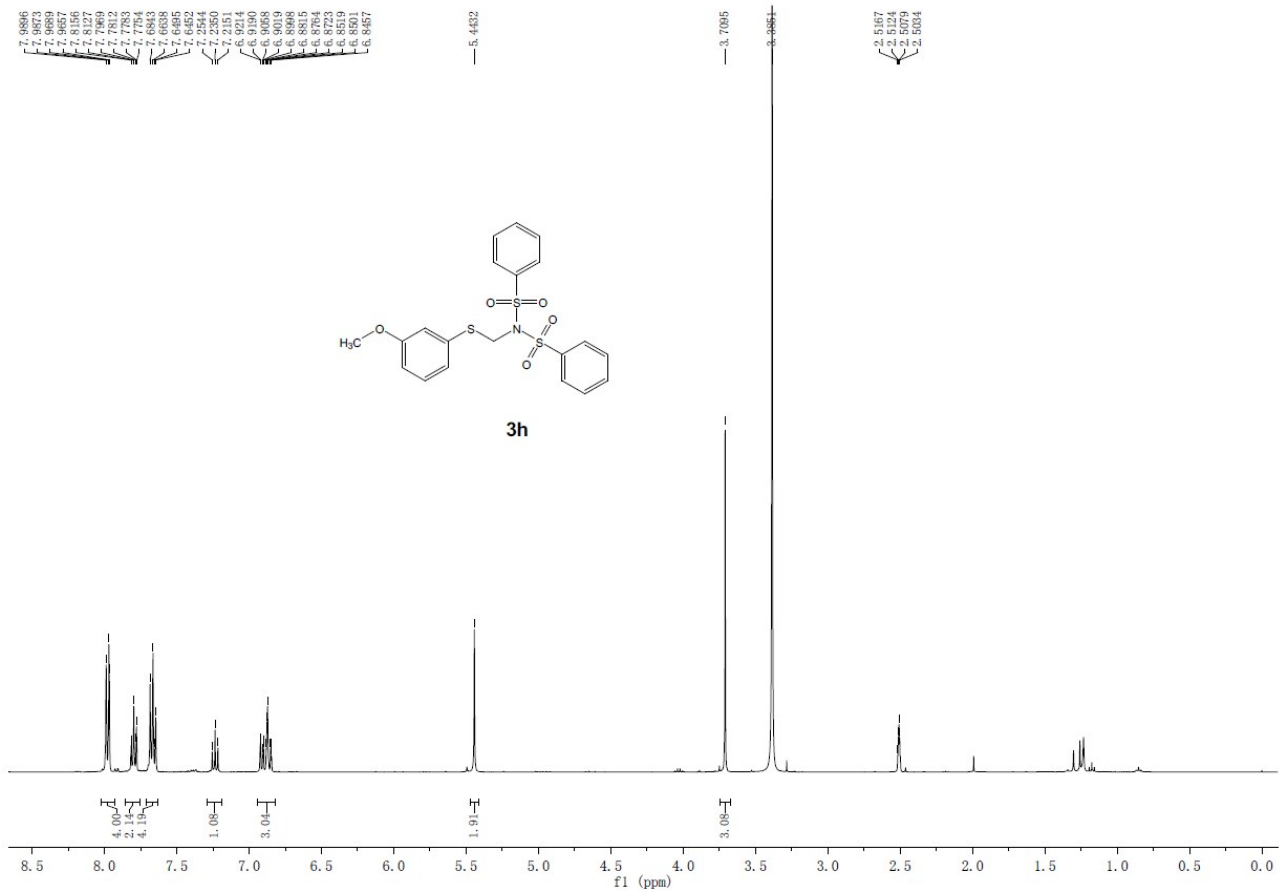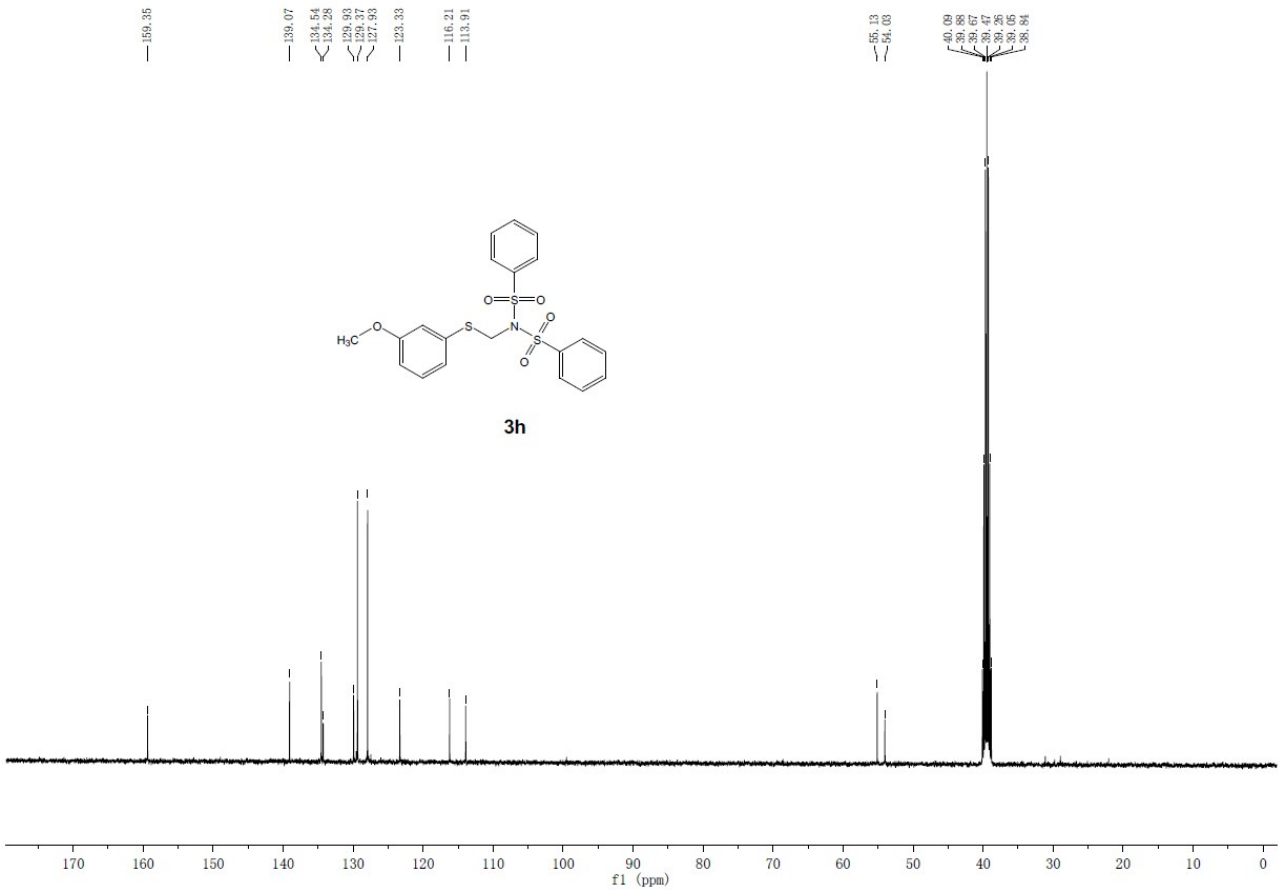



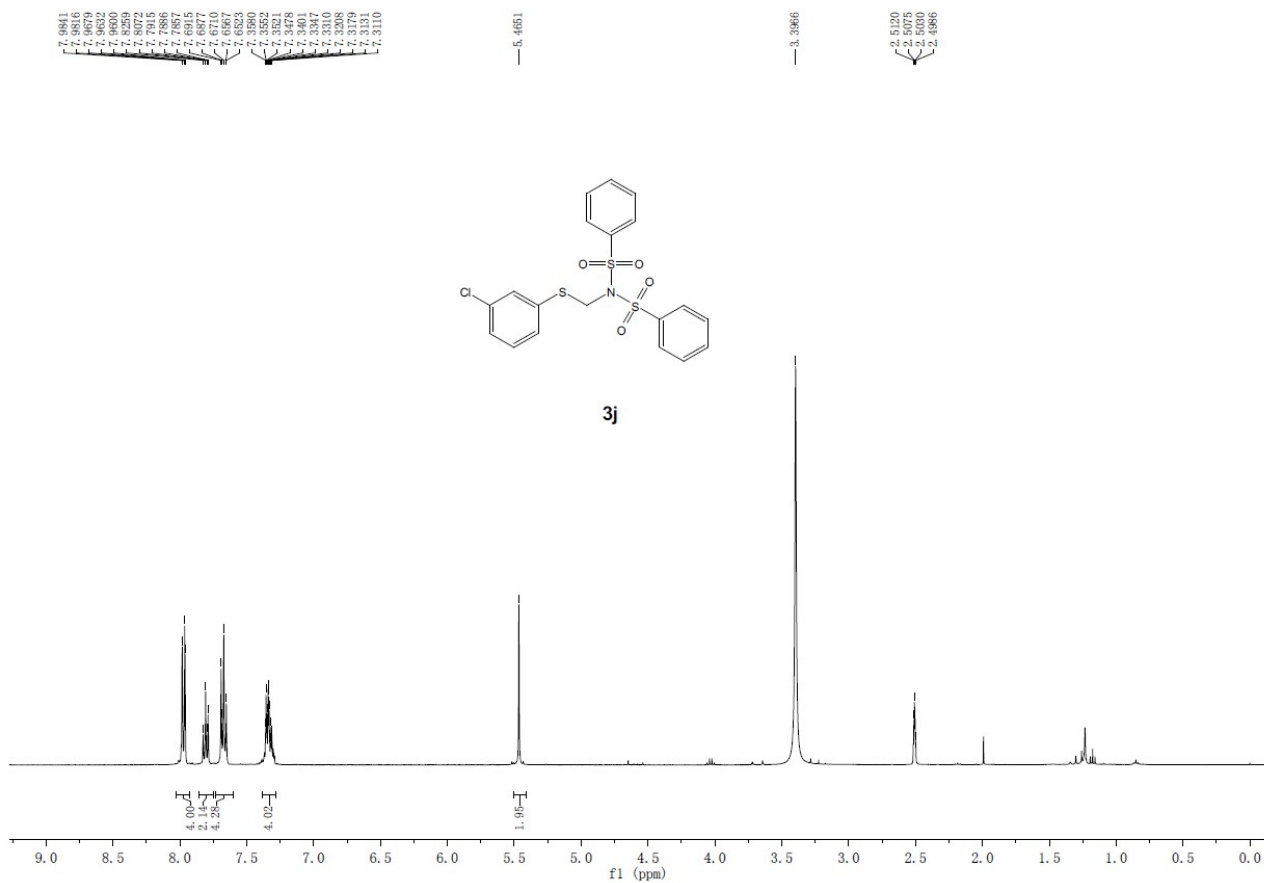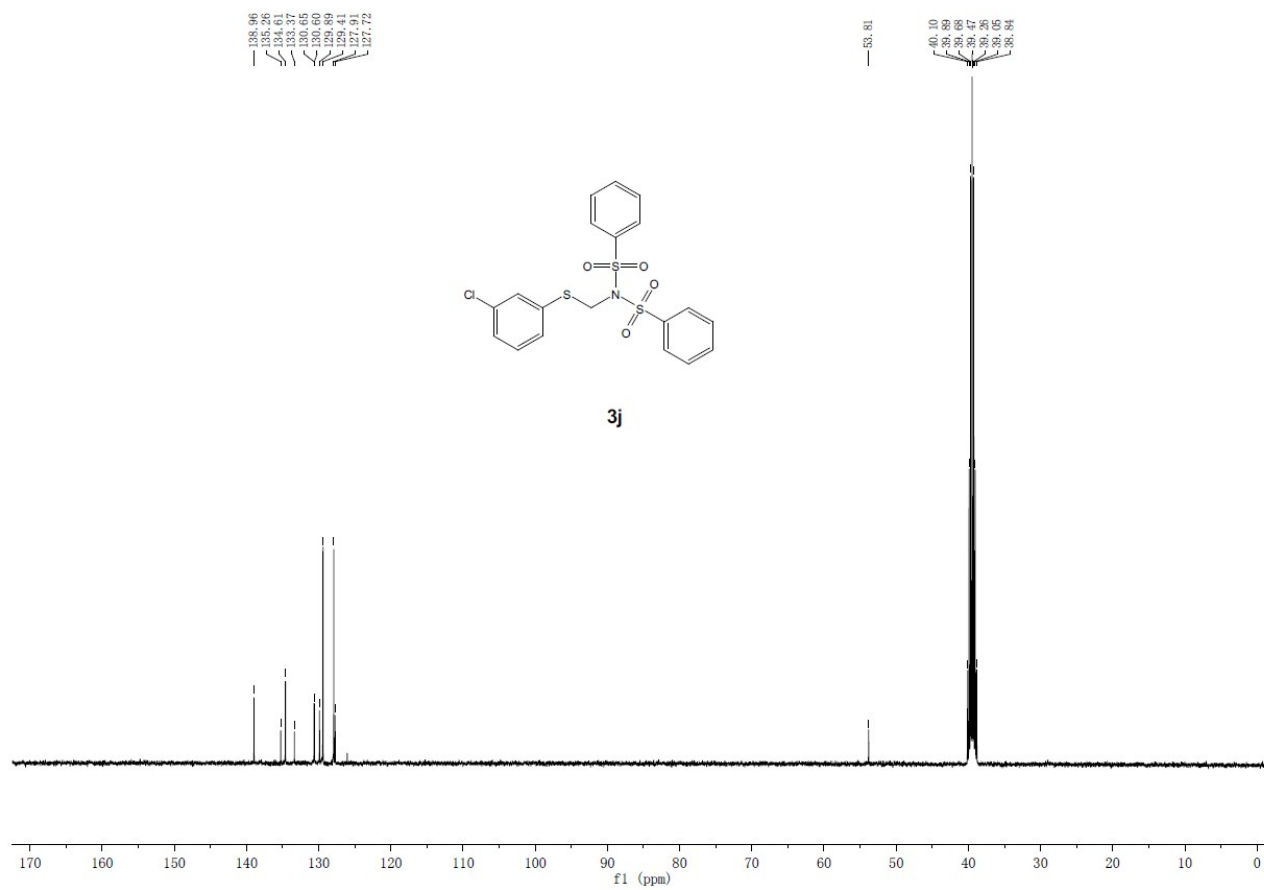

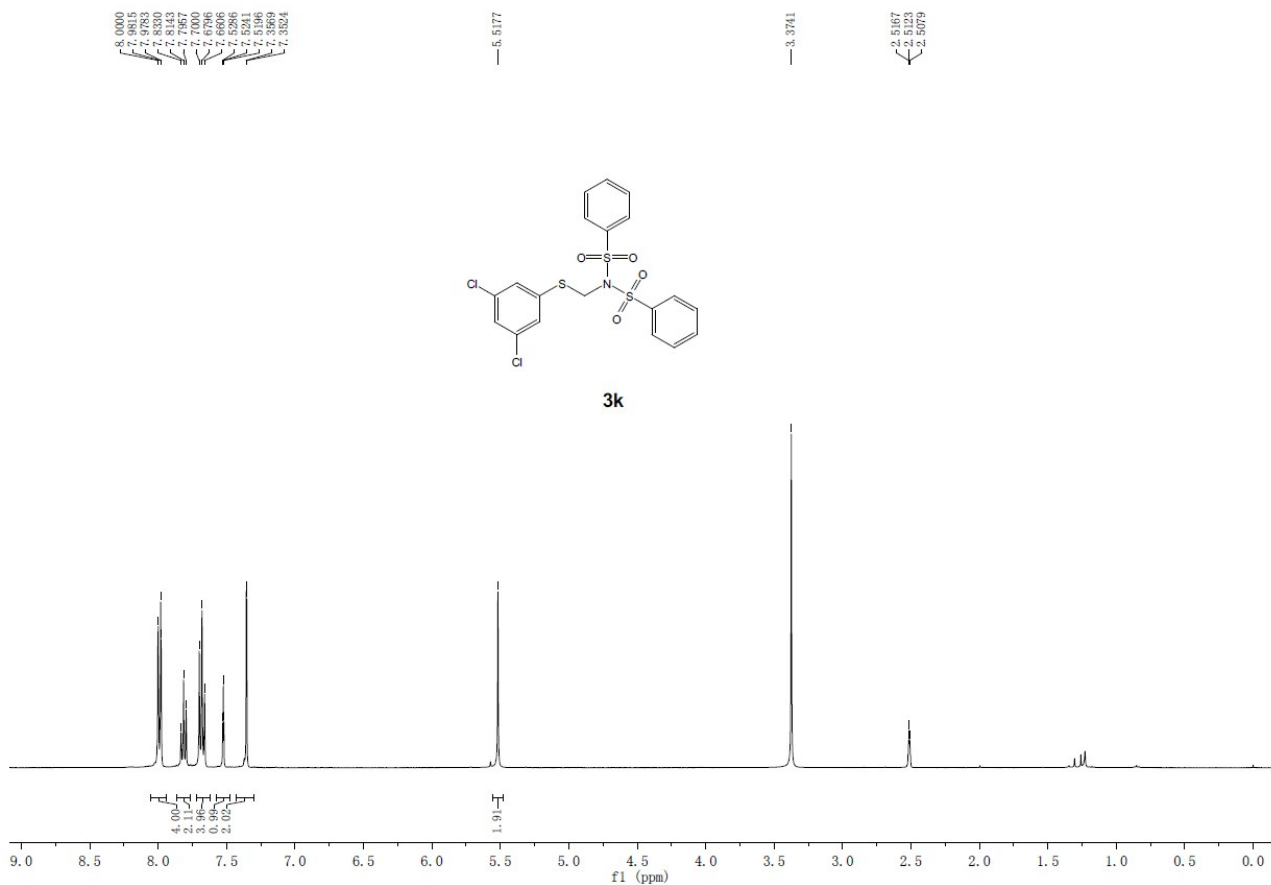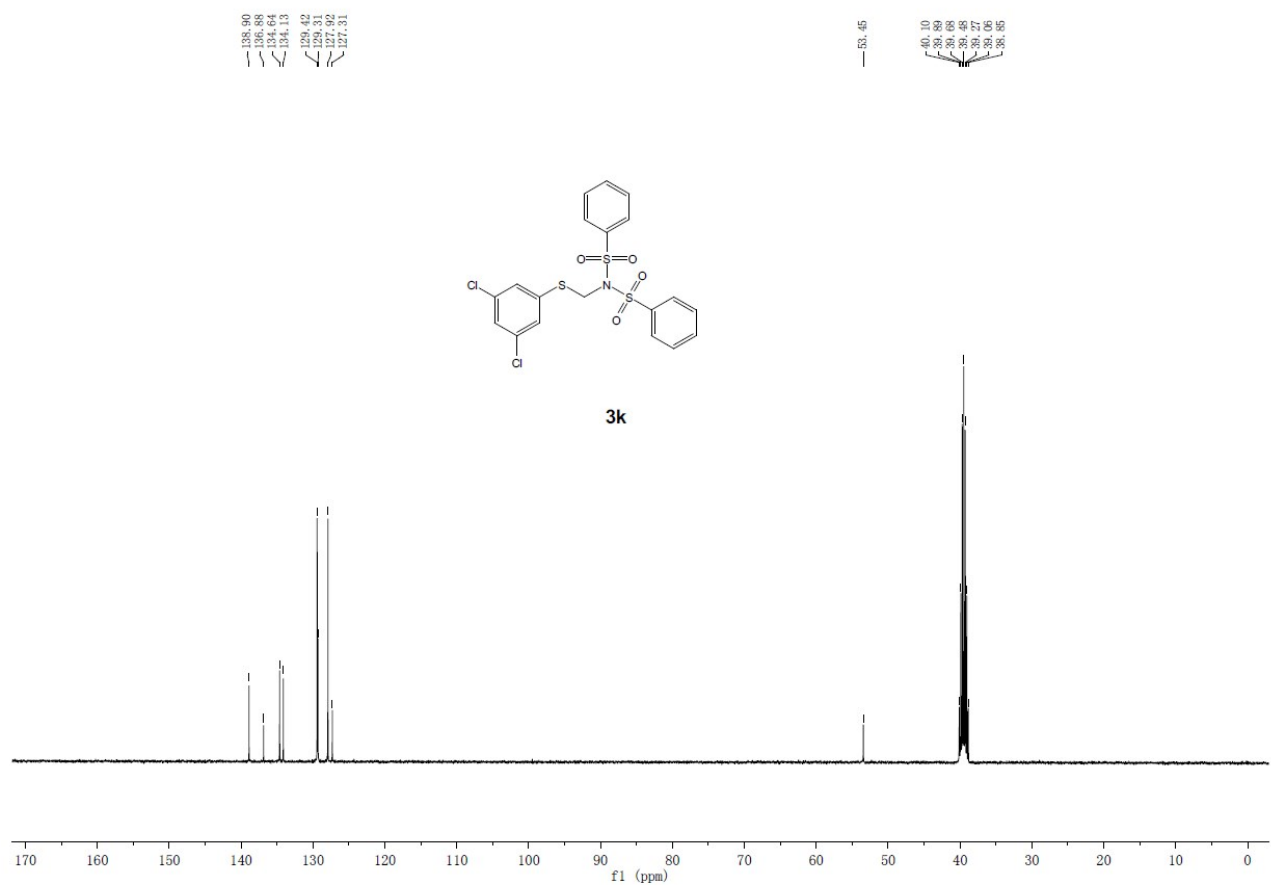

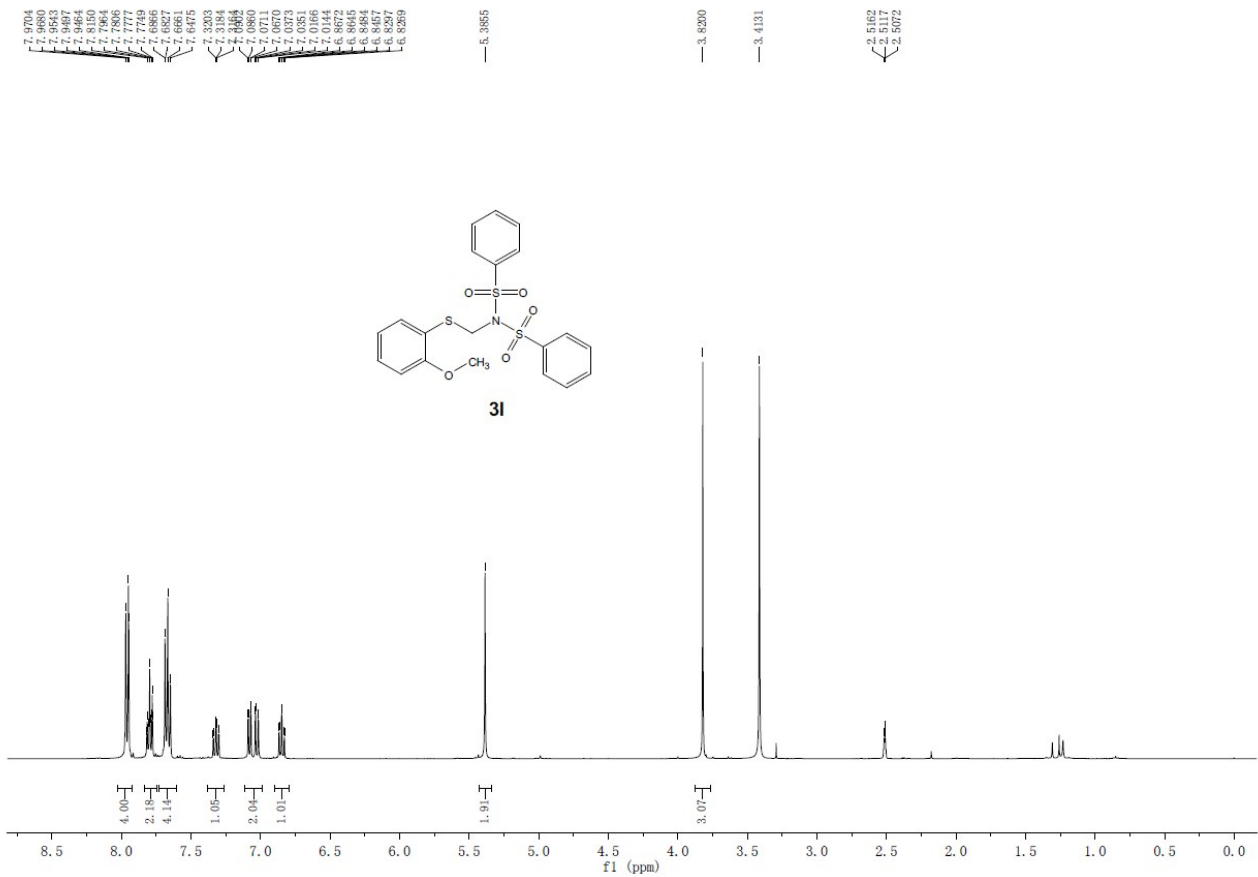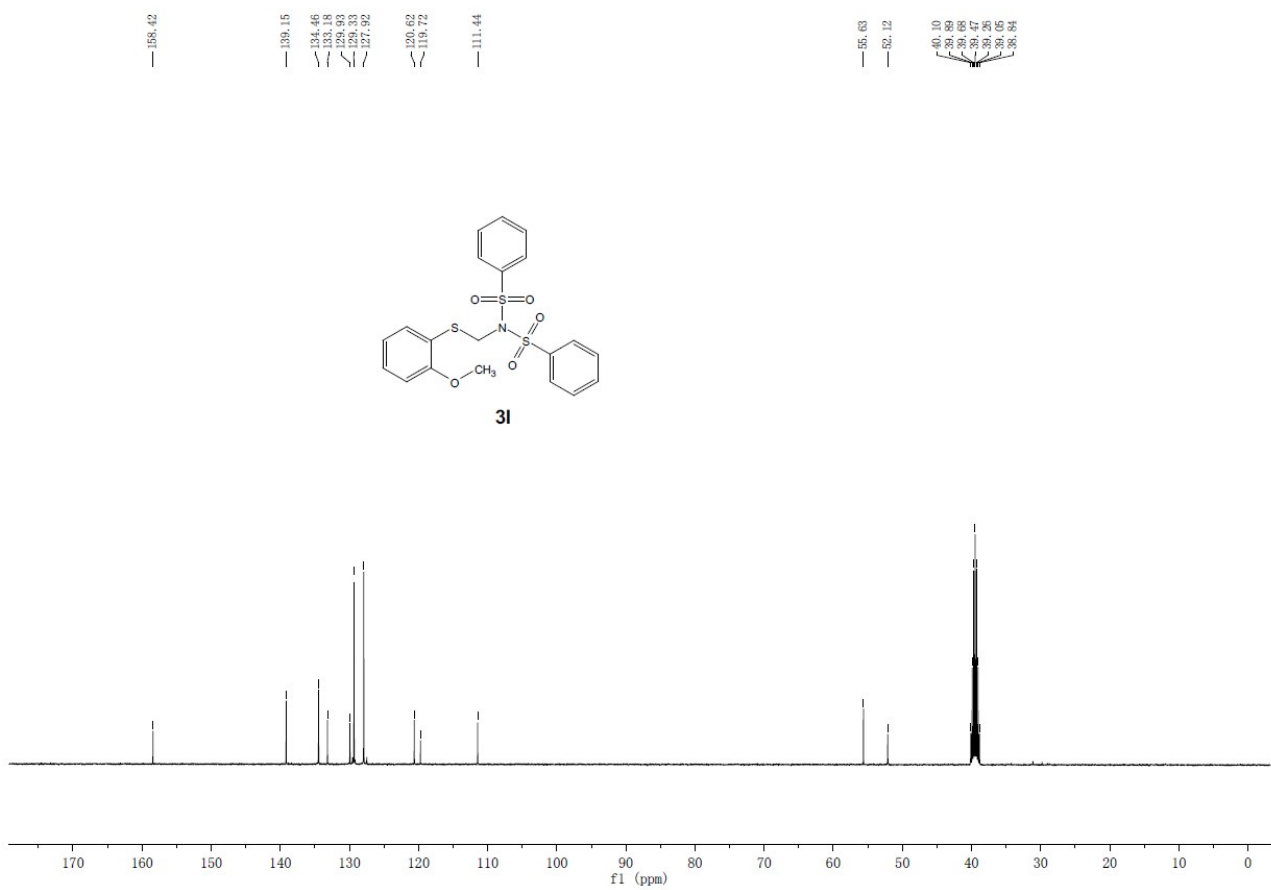

7.0355  
7.0293  
7.8075  
7.7904  
7.6723  
7.2960  
7.2891  
7.1382

5.3959

3.3735

2.5072

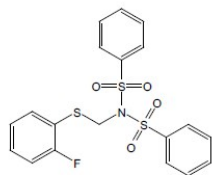

3m

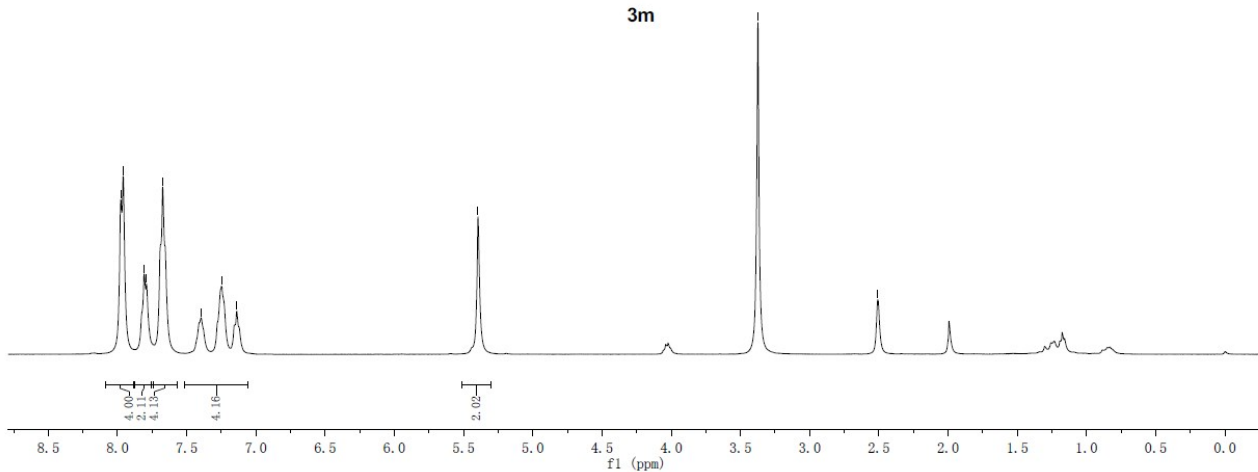

138.93  
134.62  
134.54  
130.38  
129.40  
127.94  
124.92

116.05  
115.82

53.21

40.07  
39.87  
39.65  
39.24  
39.03  
38.82

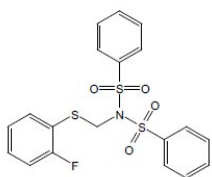

3m

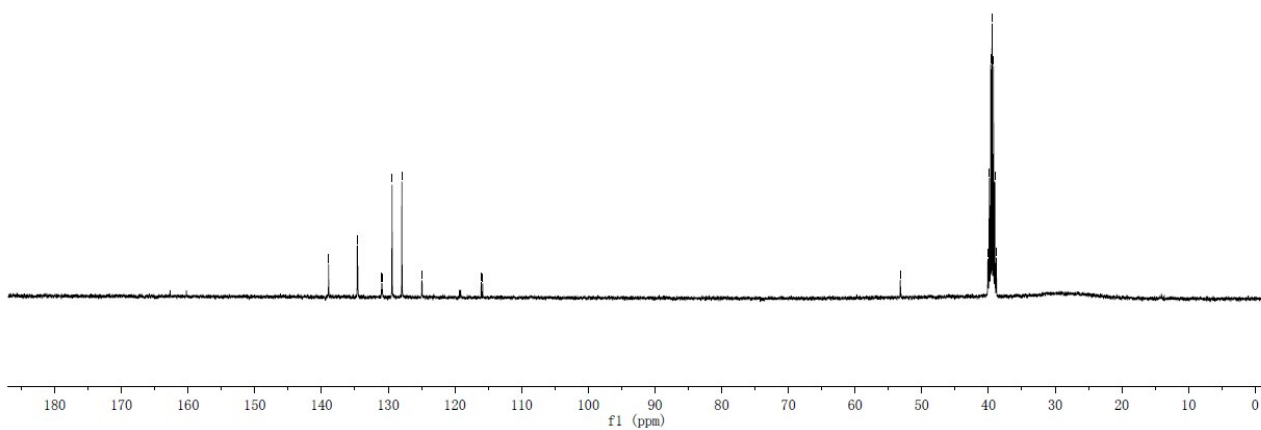

7.9876  
7.9851  
7.9715  
7.9688  
7.9658  
7.9286  
7.8288  
7.8209  
7.8182  
7.8012  
7.7883  
7.7866  
7.7826  
7.6888  
7.6848  
7.6695  
7.6559  
7.6485  
7.6126  
7.5071  
7.4955  
7.4883  
7.4315  
7.4285  
7.4162  
7.4079  
7.3271  
7.3216  
7.3177  
7.3104  
7.3029  
7.2988  
7.2942

5.4737

3.4468

2.5135  
2.5069  
2.5044

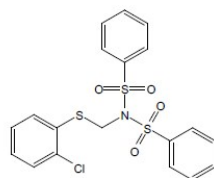

3n

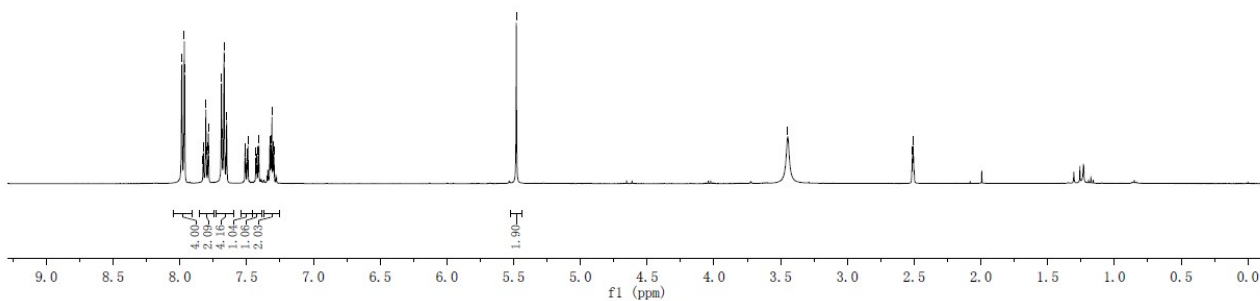

138.86  
134.64  
133.80  
132.72  
131.92  
129.81  
129.43  
127.92  
127.72

52.89

40.12  
38.91  
38.40  
38.28  
38.07  
38.57

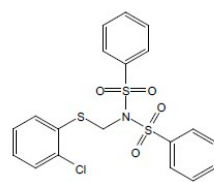

3n

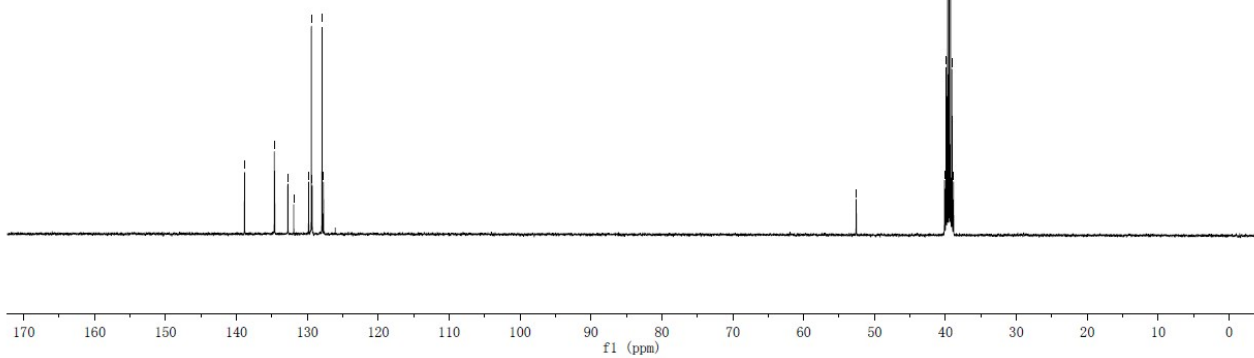



7.9698  
7.9614  
7.9777  
7.9730  
7.9878  
7.9887  
7.8249  
7.8211  
7.8095  
7.8033  
7.8014  
7.7865  
7.7866  
7.7638  
7.6953  
7.6966  
7.6643  
7.6607  
7.6554  
7.6440  
7.6408  
7.4613  
4.5714  
4.4377  
3.3732  
3.3694  
3.3516  
3.3514  
3.3318  
3.2408  
2.2213  
2.2211  
2.2181  
2.2172  
2.2026  
1.1866  
-5.4807

-3.4271  
2.5146  
2.5101  
2.5066

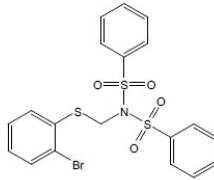

**3o**

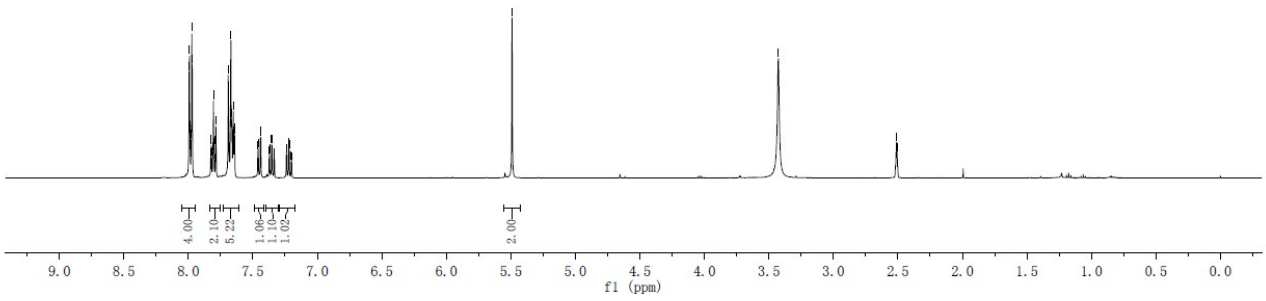

138.81  
134.66  
133.04  
132.08  
129.44  
129.15  
127.93  
124.95

-52.68  
40.11  
38.90  
38.65  
38.27  
38.06  
38.85

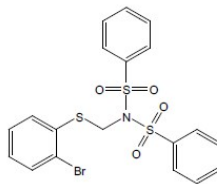

**3o**

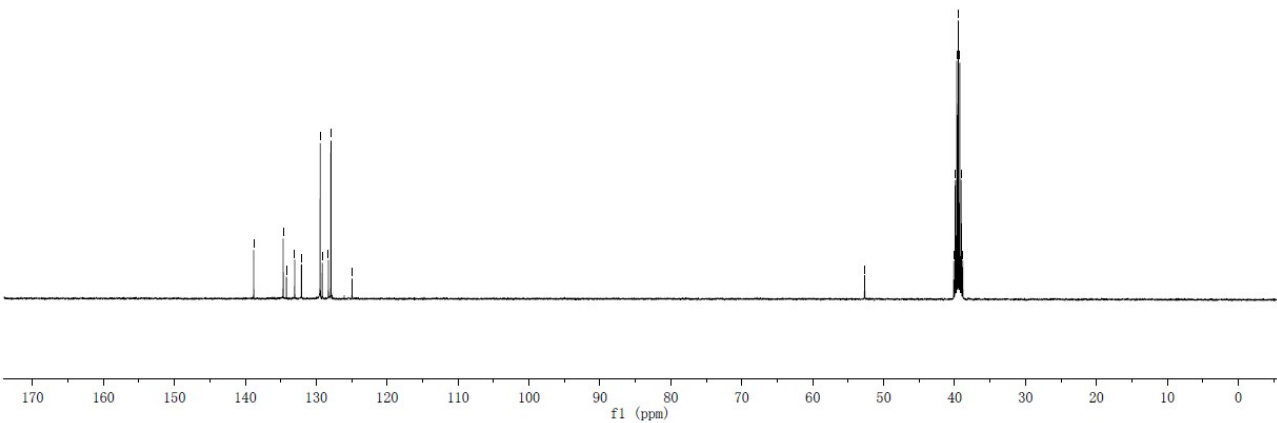

8.0450  
8.0027  
7.9843  
7.9811  
7.8286  
7.8099  
7.8025  
7.7875  
7.7341  
7.7312  
7.7281  
7.7266  
7.6942  
7.6737  
7.6593  
7.6550  
7.5282  
7.5262  
7.5263  
7.5263

5.5941

3.5381

2.5274  
2.5274  
2.5385

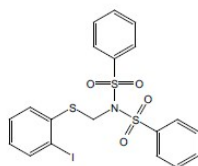

**3p**

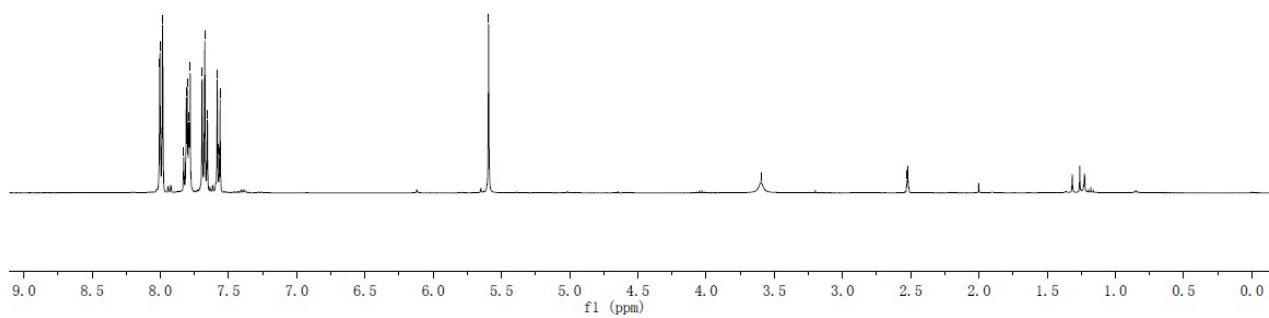

140.66  
138.75  
134.69  
132.54  
130.70  
129.45  
127.90

118.51

109.38

62.35

40.12  
39.91  
39.70  
39.49  
39.28  
39.07  
38.86

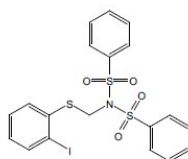

**3p**

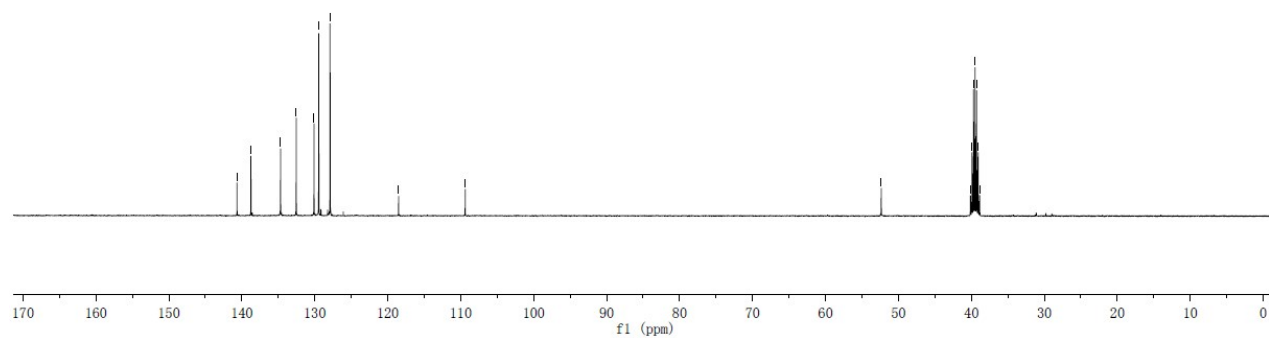

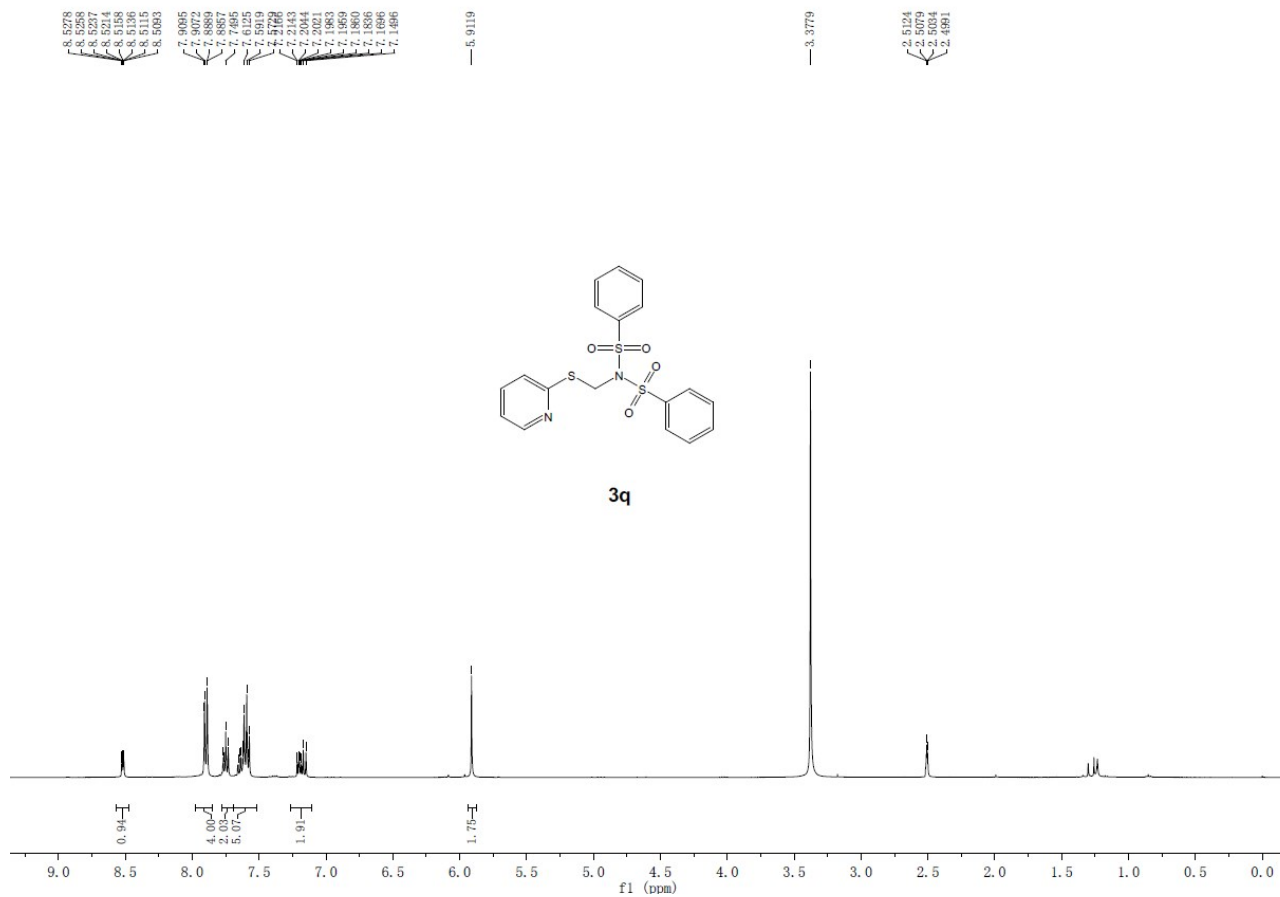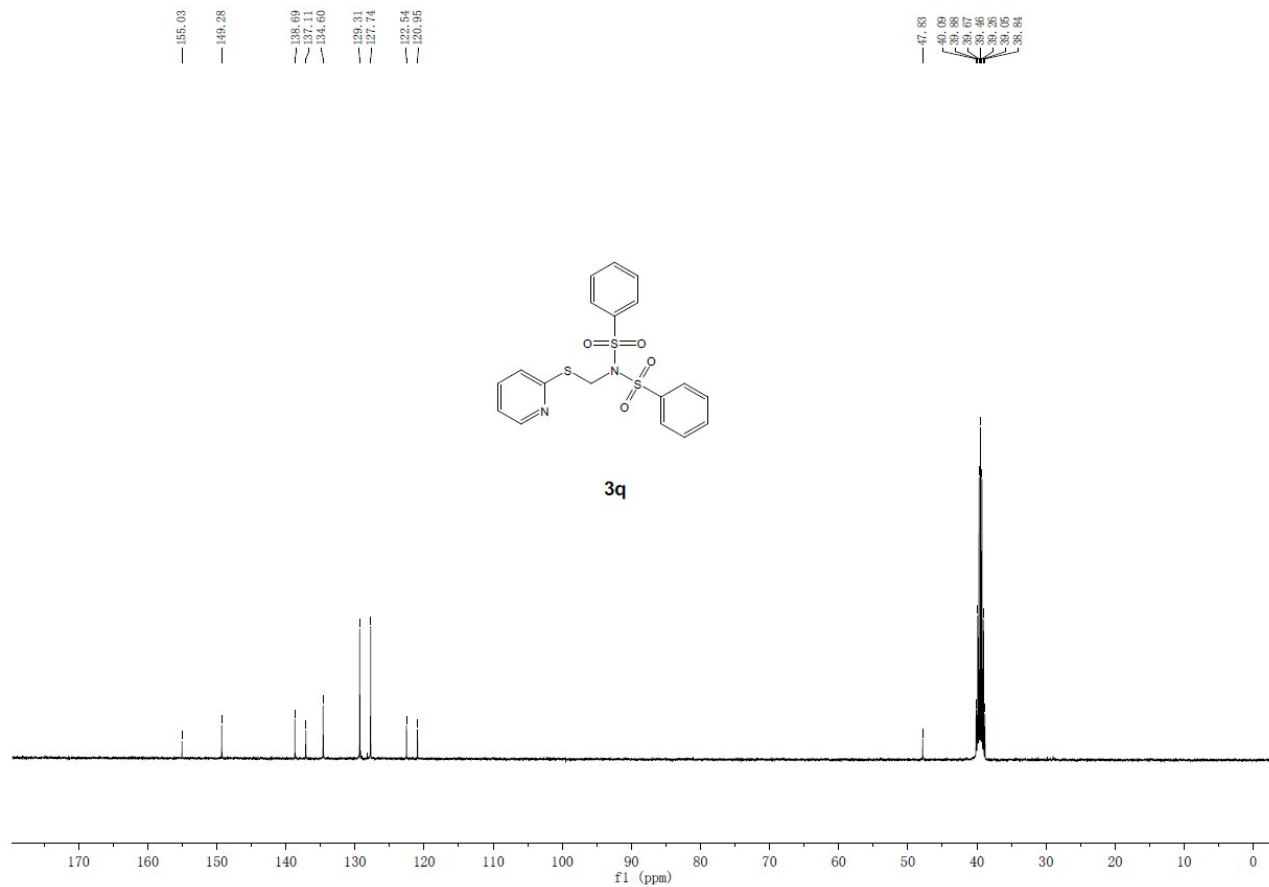

8.0375  
8.0351  
8.0215  
8.0191  
8.0155  
8.0135  
7.8353  
7.8157  
7.8124  
7.8091  
7.7981  
7.7952  
7.7173  
7.7134  
7.6998  
7.6828  
7.6805  
7.6826  
7.6790  
7.6356  
7.6316  
7.6272  
7.0152  
6.9524  
6.9466  
6.9434

5.2378

3.4077

2.5157  
2.5112  
2.5067

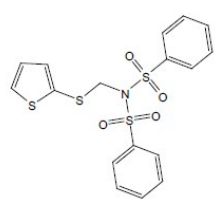

3r

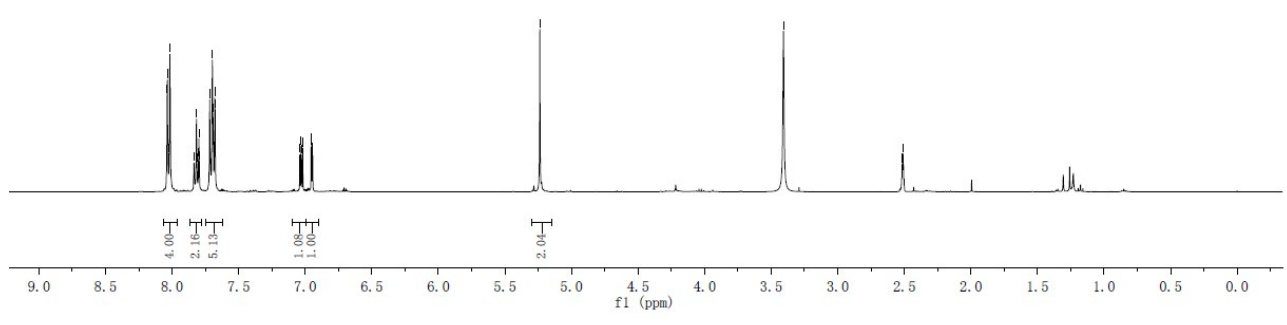

139.11  
136.81  
132.81  
132.18  
129.52  
129.43  
128.97  
127.99

57.17

40.10  
39.80  
39.69  
39.48  
39.27  
38.85

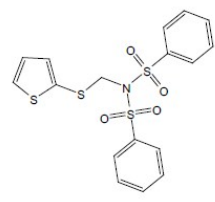

3r

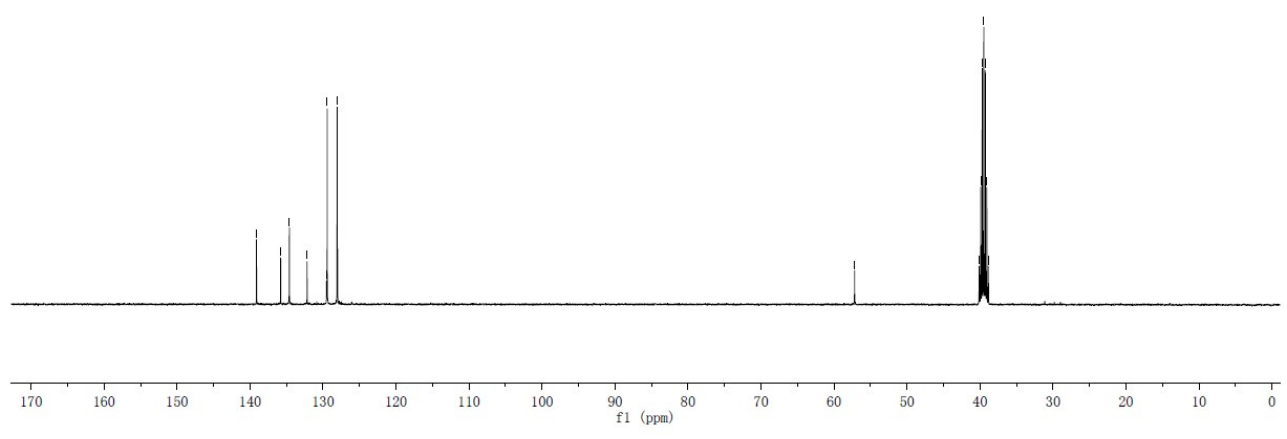

8.0569  
8.0386  
7.8104  
7.7918  
7.7732  
7.6800  
7.6614

5.0553

3.5198

2.5778  
2.5116  
2.5041  
2.4864

1.5691  
1.4859  
1.4477

0.8537  
0.8355  
0.8171

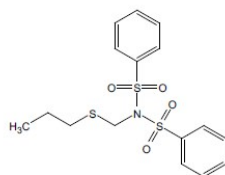

5a

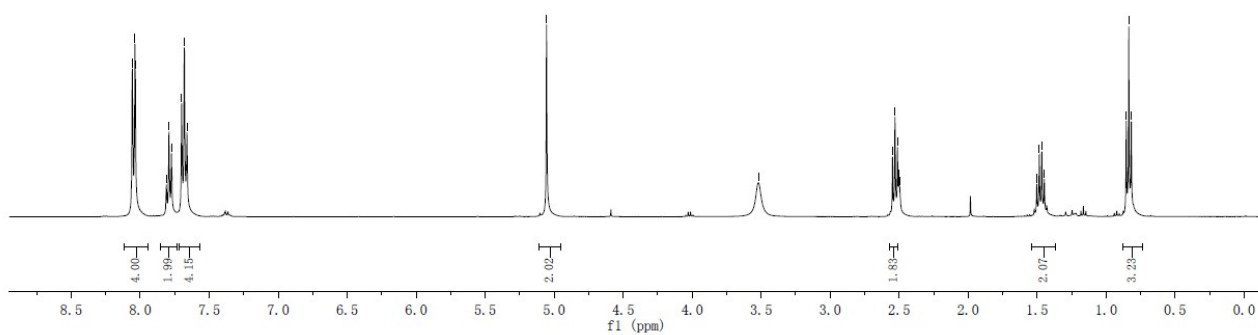

139.25  
134.44  
129.37  
127.90

51.78  
40.08  
39.87  
39.66  
39.45  
39.25  
39.04  
38.83  
38.62

22.19

13.12

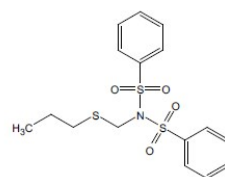

5a

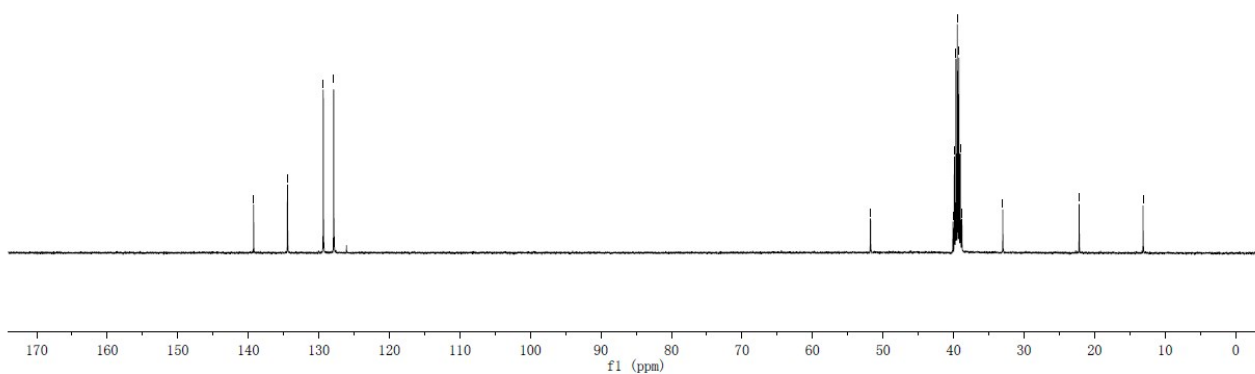

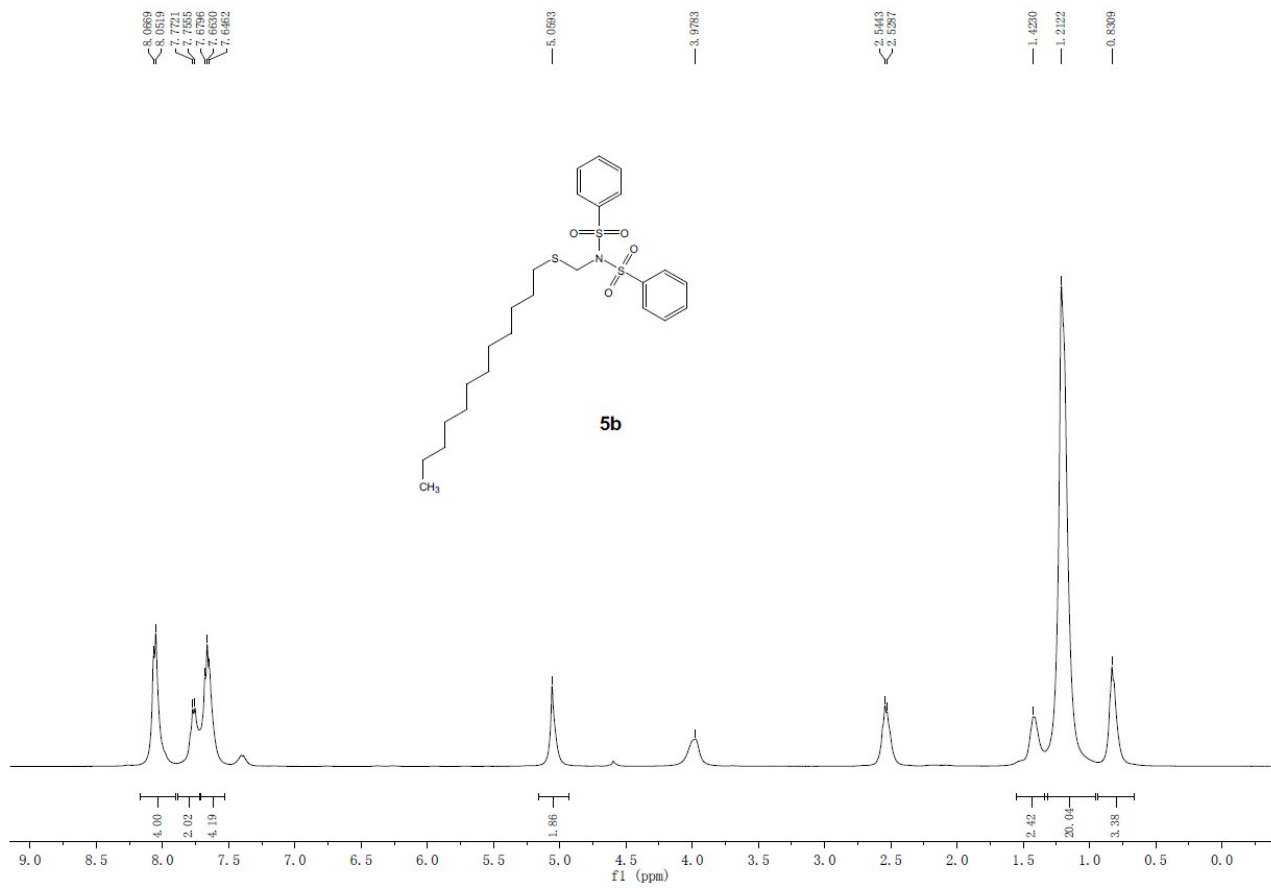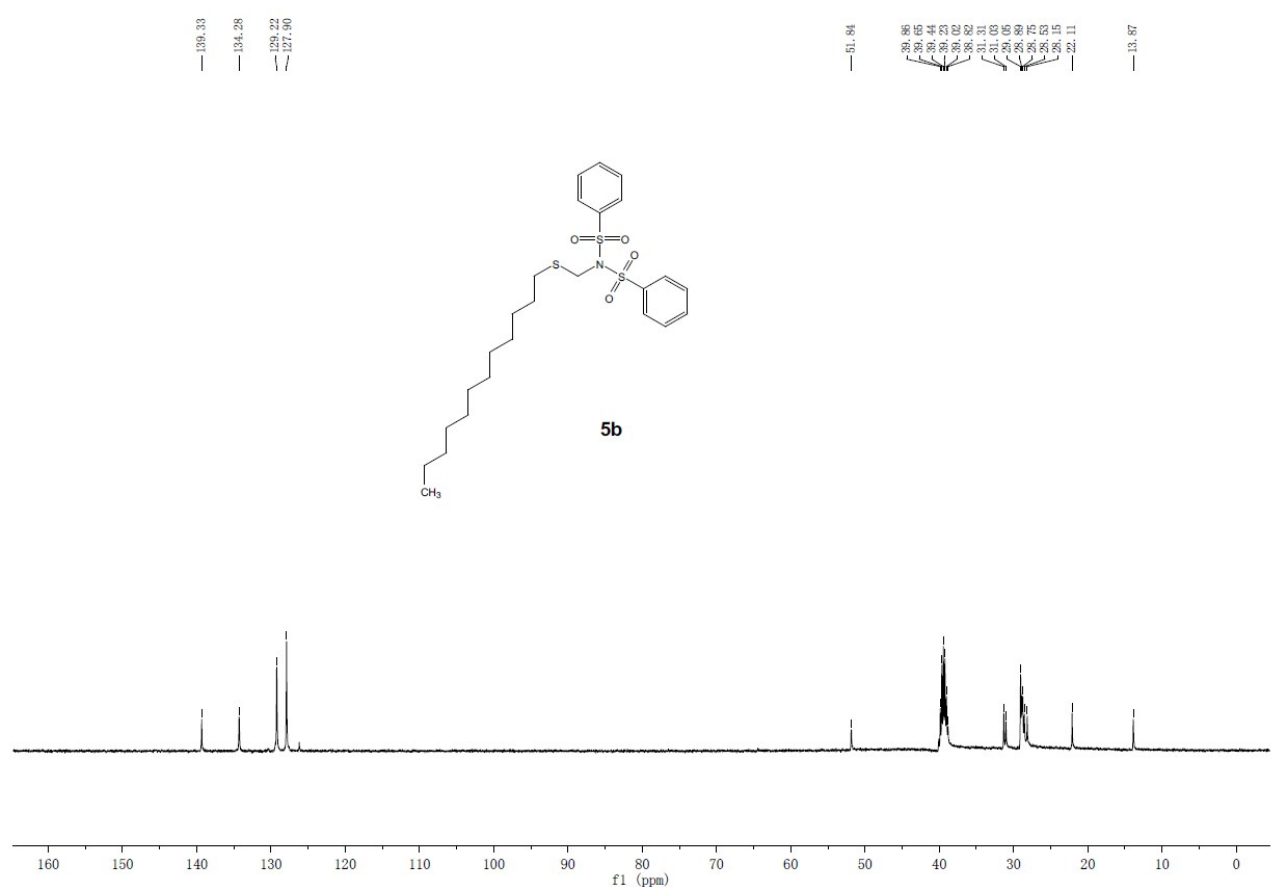

8.0927  
8.0714  
7.7858  
7.7660  
7.7649  
7.7603  
7.7544  
7.7616  
7.7589  
7.7588  
7.6644  
7.6603

5.0927

4.9205

2.5047  
2.5003  
2.4859

1.8144  
1.7917  
1.5916  
1.4751  
1.2958  
1.1661  
1.1555  
1.1485  
1.1351

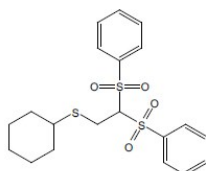

5c

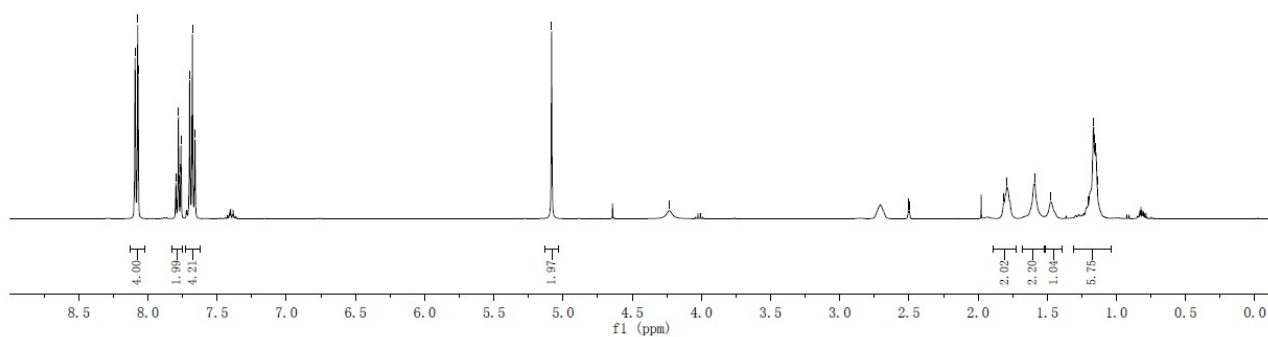

138.43  
134.37  
128.31  
127.90

50.51  
42.65  
38.88  
38.42  
38.46  
38.25  
38.05  
32.88  
25.30  
25.07

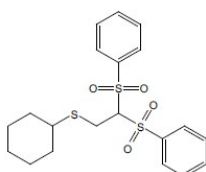

5c

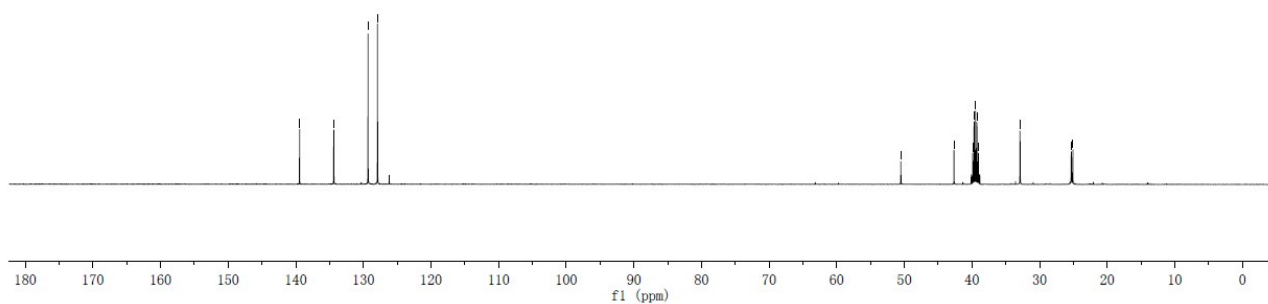

7.9831  
7.9622  
7.7598  
7.7420  
7.7401  
7.6299  
7.6109  
7.5904  
7.5784  
7.5688  
7.5655  
7.5387  
5.5641  
3.3009  
2.4033

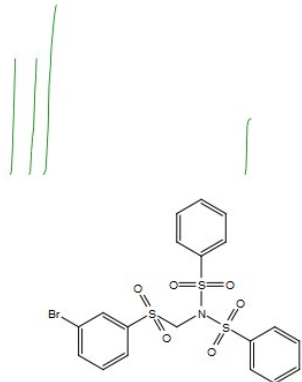

6

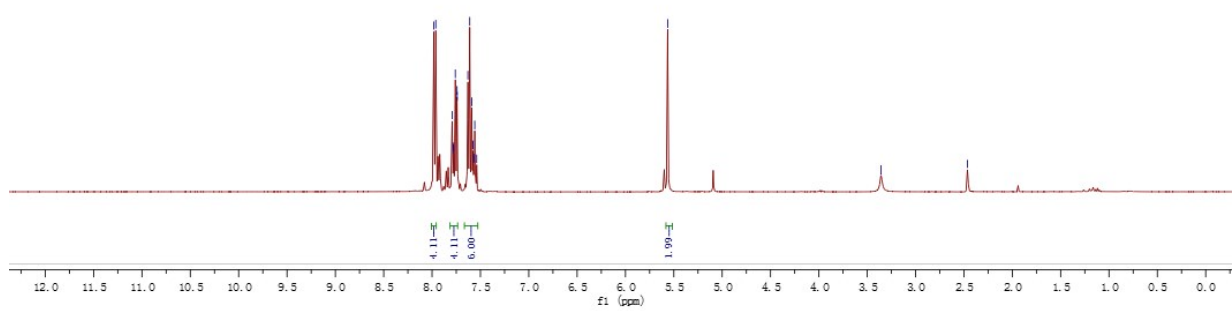

139.80  
138.63  
137.90  
135.46  
129.83  
129.11  
128.94  
128.29  
122.63  
67.60  
40.48  
40.27  
39.85  
39.04

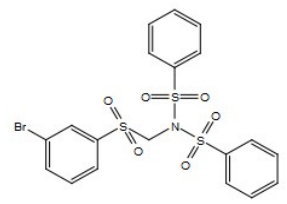

6

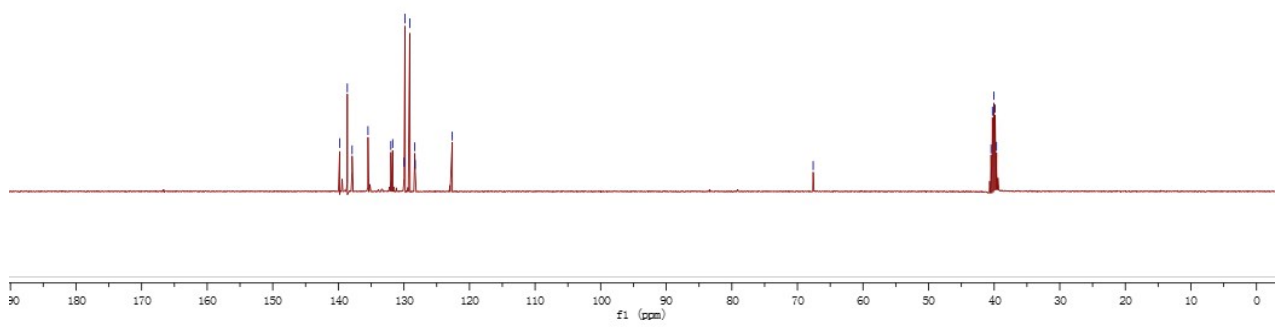

Supplement: d1ra00686j1.pdf [file d1ra00686j1.pdf]
